# Supplementary material for: GEO Database Screening Combined with In Vitro Experiments to Study the Mechanism of hsa_circ_0003570 in Infantile Hemangiomas
Source: Hindawi journal article supplement (doi:10.1155/2022/5643742), 2022-04-28
Supplement: f1 [file 5643742.f1.docx]

**Supplementary description**

The following analysis results were based on data from the GSE98795 dataset. Infantile hemangioma tumor tissue was obtained from 3 female patients 4-7 months old and 1 male patient 4 months old. The adjacent mormal skin tissue was also obtained from 3 female patients 4-7 months old and 1 male patient 4 months old. The results of GEO2R analysis showed that a total of 234 circRNAs were up-regulated and 374 circRNAs were down-regulated (FC (abs) cut-off value 1.0) in infantile hemangioma tumor tissue.

**Supplementary Table 1 The differential expression results of circRNAs.**

| circRNAs | P-value | FDR | FC (abs) | Regulation |
| --- | --- | --- | --- | --- |
| hsa_circRNA_100709 | 0.011987539 | 0.13145988 | 140.4731053 | up |
| hsa_circRNA_102116 | 0.024675361 | 0.167745645 | 39.7128551 | up |
| hsa_circRNA_051239 | 0.024125775 | 0.165873929 | 32.0263747 | up |
| hsa_circRNA_000881 | 0.002357536 | 0.087039066 | 23.0906294 | down |
| hsa_circRNA_023016 | 0.001851691 | 0.078843148 | 16.9536603 | down |
| hsa_circRNA_001654 | 0.004992266 | 0.101969364 | 14.7615911 | down |
| hsa_circRNA_405814 | 0.000369364 | 0.056194909 | 14.0249517 | down |
| hsa_circRNA_101491 | 0.00931396 | 0.120727237 | 13.9247518 | down |
| hsa_circRNA_051238 | 0.029380767 | 0.178712772 | 11.6269681 | up |
| hsa_circRNA_406655 | 0.002642282 | 0.088334608 | 10.8667362 | down |
| hsa_circRNA_406698 | 0.002408828 | 0.08748991 | 10.6268412 | down |
| hsa_circRNA_001490 | 0.017387726 | 0.148589775 | 10.318568 | down |
| hsa_circRNA_001409 | 0.007660112 | 0.115291073 | 10.247663 | down |
| hsa_circRNA_001653 | 0.004674819 | 0.098733985 | 9.9350058 | down |
| hsa_circRNA_104310 | 0.029286378 | 0.178636109 | 9.730785 | down |
| hsa_circRNA_103801 | 0.015236928 | 0.141844688 | 9.4275649 | down |
| hsa_circRNA_101214 | 0.022144676 | 0.160667988 | 8.8626486 | up |
| hsa_circRNA_406157 | 0.035854829 | 0.189259397 | 8.8284117 | down |
| hsa_circRNA_103372 | 0.028791479 | 0.177580786 | 8.5615393 | down |
| hsa_circRNA_002086 | 0.002052704 | 0.082820134 | 8.4500804 | down |
| hsa_circRNA_081481 | 0.044705274 | 0.209271594 | 8.2968474 | down |
| hsa_circRNA_406768 | 0.033599476 | 0.185622638 | 8.2744989 | down |
| hsa_circRNA_100933 | 0.0009886 | 0.070460854 | 7.8441969 | up |
| hsa_circRNA_025522 | 0.03232331 | 0.183369816 | 7.8171096 | down |
| hsa_circRNA_102445 | 0.021077246 | 0.158669002 | 7.5028893 | down |
| hsa_circRNA_405963 | 0.048087228 | 0.216312445 | 7.4670894 | down |
| hsa_circRNA_001459 | 0.012791698 | 0.133816626 | 7.2809873 | down |
| hsa_circRNA_092418 | 0.028531937 | 0.177451108 | 6.929768 | down |
| hsa_circRNA_101522 | 0.027719487 | 0.174962635 | 6.8743219 | down |
| hsa_circRNA_103361 | 0.037986172 | 0.194469253 | 6.4349984 | down |
| hsa_circRNA_103269 | 0.034555389 | 0.186891188 | 6.3870447 | down |
| hsa_circRNA_001131 | 0.003278161 | 0.090929185 | 6.328927 | down |
| hsa_circRNA_065656 | 0.006923221 | 0.111511864 | 6.2888944 | down |
| hsa_circRNA_406881 | 0.048630993 | 0.217535716 | 6.1782223 | down |
| hsa_circRNA_102538 | 0.031357969 | 0.181630438 | 6.1740721 | up |
| hsa_circRNA_092523 | 0.015497009 | 0.143292005 | 6.1478536 | down |
| hsa_circRNA_104434 | 0.033542939 | 0.185622638 | 5.9899579 | down |
| hsa_circRNA_102492 | 0.035826195 | 0.189259397 | 5.8667824 | down |
| hsa_circRNA_103405 | 0.0093379 | 0.120768884 | 5.8580002 | down |
| hsa_circRNA_000618 | 0.032072354 | 0.183369816 | 5.8372248 | down |
| hsa_circRNA_005801 | 0.013112152 | 0.134162973 | 5.8042568 | down |
| hsa_circRNA_102838 | 0.034046163 | 0.186578139 | 5.7151184 | down |
| hsa_circRNA_400033 | 0.044847106 | 0.209637112 | 5.6781337 | down |
| hsa_circRNA_404935 | 0.032700245 | 0.184164296 | 5.6502436 | down |
| hsa_circRNA_035222 | 0.014585459 | 0.139241824 | 5.5673851 | down |
| hsa_circRNA_007192 | 0.012802758 | 0.133816626 | 5.5565919 | down |
| hsa_circRNA_100139 | 0.018591602 | 0.151974211 | 5.5173758 | down |
| hsa_circRNA_004183 | 0.037638552 | 0.193851808 | 5.4893876 | down |
| hsa_circRNA_401782 | 0.015336616 | 0.142671743 | 5.4733486 | up |
| hsa_circRNA_101439 | 0.003566642 | 0.093136243 | 5.430701 | up |
| hsa_circRNA_048148 | 0.014114743 | 0.137529877 | 5.4289834 | down |
| hsa_circRNA_101985 | 0.044645669 | 0.209189867 | 5.4260868 | up |
| hsa_circRNA_407088 | 0.029826563 | 0.178902247 | 5.3968795 | down |
| hsa_circRNA_000938 | 0.034450059 | 0.186891188 | 5.3695278 | down |
| hsa_circRNA_103953 | 0.011820028 | 0.131082465 | 5.3638913 | down |
| hsa_circRNA_405952 | 0.029184395 | 0.178388261 | 5.3066999 | down |
| hsa_circRNA_100945 | 0.005812667 | 0.106632303 | 5.218907 | up |
| hsa_circRNA_104162 | 0.002574794 | 0.088334608 | 5.1287171 | up |
| hsa_circRNA_092520 | 0.045785677 | 0.211841292 | 5.0827264 | down |
| hsa_circRNA_037366 | 0.038104643 | 0.194727455 | 5.0631502 | down |
| hsa_circRNA_103931 | 0.028059862 | 0.175677975 | 5.0433291 | down |
| hsa_circRNA_406988 | 0.022462141 | 0.161899726 | 5.017046 | down |
| hsa_circRNA_406829 | 0.000651107 | 0.062515763 | 4.9700166 | down |
| hsa_circRNA_406281 | 0.023322404 | 0.163791978 | 4.939846 | down |
| hsa_circRNA_403382 | 0.010497365 | 0.125705104 | 4.9119489 | up |
| hsa_circRNA_104270 | 0.01274139 | 0.133816626 | 4.905177 | down |
| hsa_circRNA_102039 | 0.004147533 | 0.097558365 | 4.8146511 | up |
| hsa_circRNA_101216 | 0.000424718 | 0.059433347 | 4.8103127 | down |
| hsa_circRNA_404818 | 0.046452724 | 0.21335165 | 4.7961478 | down |
| hsa_circRNA_102872 | 0.026556988 | 0.172084051 | 4.7924457 | down |
| hsa_circRNA_077582 | 0.034220735 | 0.186891188 | 4.7380277 | down |
| hsa_circRNA_023983 | 0.019975958 | 0.15585039 | 4.7281188 | up |
| hsa_circRNA_011491 | 0.006561638 | 0.109679817 | 4.6859803 | down |
| hsa_circRNA_402150 | 0.02702371 | 0.173654073 | 4.6552075 | down |
| hsa_circRNA_003030 | 0.001163617 | 0.072886747 | 4.6405793 | up |
| hsa_circRNA_025750 | 0.037869464 | 0.194283222 | 4.5818872 | down |
| hsa_circRNA_406889 | 0.003826266 | 0.095187701 | 4.5051772 | down |
| hsa_circRNA_001241 | 0.016859511 | 0.147453464 | 4.4112118 | down |
| hsa_circRNA_004077 | 0.016103765 | 0.145171629 | 4.2932179 | down |
| hsa_circRNA_402294 | 0.00016819 | 0.048759306 | 4.2657285 | up |
| hsa_circRNA_104208 | 0.038714934 | 0.195430758 | 4.2581028 | down |
| hsa_circRNA_001992 | 0.004369063 | 0.098733985 | 4.1905197 | up |
| hsa_circRNA_101832 | 0.004650408 | 0.098733985 | 4.1859779 | down |
| hsa_circRNA_091419 | 0.016858605 | 0.147453464 | 4.1743891 | down |
| hsa_circRNA_406605 | 0.002353022 | 0.087039066 | 4.1468001 | down |
| hsa_circRNA_104214 | 0.032960085 | 0.184505681 | 4.1449789 | down |
| hsa_circRNA_101471 | 0.033845493 | 0.186199756 | 4.135236 | down |
| hsa_circRNA_100008 | 0.04113726 | 0.200637568 | 4.0977454 | down |
| hsa_circRNA_001729 | 0.020235562 | 0.156532278 | 4.0886613 | down |
| hsa_circRNA_405882 | 0.003650823 | 0.093558455 | 4.0728925 | down |
| hsa_circRNA_079373 | 0.015667587 | 0.143694485 | 4.0496685 | down |
| hsa_circRNA_405788 | 0.013693809 | 0.136495075 | 4.0489984 | down |
| hsa_circRNA_100606 | 0.030585876 | 0.179931653 | 4.0475653 | down |
| hsa_circRNA_002554 | 0.014310406 | 0.138379944 | 4.0272958 | down |
| hsa_circRNA_404994 | 0.000868795 | 0.068024601 | 4.0102717 | down |
| hsa_circRNA_404686 | 0.008307566 | 0.117385969 | 3.9819562 | down |
| hsa_circRNA_079381 | 0.013352325 | 0.134793924 | 3.975242 | down |
| hsa_circRNA_104163 | 0.008650587 | 0.118458844 | 3.9298525 | up |
| hsa_circRNA_100319 | 0.001128571 | 0.072732828 | 3.9150382 | down |
| hsa_circRNA_404595 | 0.035622785 | 0.189020619 | 3.8656139 | down |
| hsa_circRNA_405685 | 0.008072859 | 0.115999129 | 3.8645084 | down |
| hsa_circRNA_004097 | 0.010186558 | 0.125271574 | 3.8556294 | down |
| hsa_circRNA_022920 | 0.038098161 | 0.194727455 | 3.8278565 | down |
| hsa_circRNA_401844 | 0.039185052 | 0.195873239 | 3.8272586 | down |
| hsa_circRNA_016121 | 0.009352846 | 0.120768884 | 3.8221563 | up |
| hsa_circRNA_001359 | 0.011361143 | 0.129165497 | 3.7858824 | down |
| hsa_circRNA_007104 | 0.006540657 | 0.109679817 | 3.7728362 | up |
| hsa_circRNA_101996 | 0.000843689 | 0.067818952 | 3.6744424 | up |
| hsa_circRNA_034093 | 0.001587492 | 0.078843148 | 3.672324 | down |
| hsa_circRNA_055440 | 0.031455607 | 0.181875625 | 3.672205 | down |
| hsa_circRNA_404978 | 0.004614898 | 0.098733985 | 3.6671552 | down |
| hsa_circRNA_101911 | 0.010243001 | 0.125347901 | 3.6625757 | down |
| hsa_circRNA_101373 | 0.011653286 | 0.130470375 | 3.6514917 | down |
| hsa_circRNA_103837 | 0.016160108 | 0.145171629 | 3.6471939 | up |
| hsa_circRNA_102881 | 0.011032988 | 0.127641098 | 3.6293408 | up |
| hsa_circRNA_004090 | 0.015639916 | 0.143664423 | 3.6204413 | down |
| hsa_circRNA_101857 | 0.013119436 | 0.134162973 | 3.6117697 | down |
| hsa_circRNA_104391 | 0.028646127 | 0.177580786 | 3.5900916 | down |
| hsa_circRNA_404446 | 0.005708575 | 0.106632303 | 3.5897707 | up |
| hsa_circRNA_008581 | 0.003164407 | 0.090269125 | 3.5843713 | up |
| hsa_circRNA_104227 | 0.001739117 | 0.078843148 | 3.5734669 | down |
| hsa_circRNA_102120 | 0.025919827 | 0.170462913 | 3.5731996 | down |
| hsa_circRNA_003532 | 0.012866334 | 0.133816626 | 3.5664965 | down |
| hsa_circRNA_003074 | 0.028829346 | 0.17760957 | 3.5515246 | down |
| hsa_circRNA_102235 | 0.02321436 | 0.163791978 | 3.5491834 | down |
| hsa_circRNA_406541 | 0.017329412 | 0.148212666 | 3.5253071 | down |
| hsa_circRNA_001229 | 0.00348457 | 0.092785495 | 3.4700319 | down |
| hsa_circRNA_104510 | 0.027645931 | 0.174824247 | 3.4696745 | down |
| hsa_circRNA_091761 | 0.033306904 | 0.185329535 | 3.4660346 | down |
| hsa_circRNA_016476 | 0.037214271 | 0.19295234 | 3.4606967 | down |
| hsa_circRNA_067130 | 0.020754775 | 0.157855883 | 3.4539705 | down |
| hsa_circRNA_406067 | 0.014987432 | 0.140254704 | 3.4427407 | down |
| hsa_circRNA_006397 | 0.024450676 | 0.167077501 | 3.4397366 | down |
| hsa_circRNA_005855 | 1.00756E-05 | 0.034364562 | 3.4258109 | up |
| hsa_circRNA_102051 | 0.017148981 | 0.148009418 | 3.397467 | down |
| hsa_circRNA_100079 | 0.002210423 | 0.084639024 | 3.3920044 | down |
| hsa_circRNA_000367 | 0.013930992 | 0.137264619 | 3.3610105 | down |
| hsa_circRNA_102073 | 0.005820434 | 0.106632303 | 3.3603677 | down |
| hsa_circRNA_103107 | 0.025072715 | 0.168440496 | 3.34255 | down |
| hsa_circRNA_102558 | 0.049687203 | 0.219323982 | 3.3388617 | up |
| hsa_circRNA_102207 | 0.004502354 | 0.098733985 | 3.3268663 | down |
| hsa_circRNA_102049 | 0.014862206 | 0.139806044 | 3.3243164 | down |
| hsa_circRNA_004496 | 0.002175536 | 0.084415928 | 3.3123782 | down |
| hsa_circRNA_101266 | 0.009176732 | 0.120415341 | 3.2973539 | up |
| hsa_circRNA_002659 | 0.005192504 | 0.103960734 | 3.2847083 | down |
| hsa_circRNA_101025 | 0.000532564 | 0.061753328 | 3.2786798 | down |
| hsa_circRNA_102485 | 0.021360656 | 0.158744671 | 3.2546084 | down |
| hsa_circRNA_407273 | 0.001438336 | 0.077949144 | 3.2421212 | down |
| hsa_circRNA_101336 | 0.016752196 | 0.147316409 | 3.2413834 | down |
| hsa_circRNA_001734 | 0.022133359 | 0.160667988 | 3.2122109 | down |
| hsa_circRNA_042437 | 0.00848128 | 0.118458844 | 3.2046999 | up |
| hsa_circRNA_403106 | 0.000743964 | 0.065678579 | 3.2037141 | up |
| hsa_circRNA_103327 | 0.03567882 | 0.189110118 | 3.1930786 | down |
| hsa_circRNA_100986 | 0.038792555 | 0.195508532 | 3.1838408 | up |
| hsa_circRNA_406637 | 0.00976301 | 0.124079842 | 3.1822502 | down |
| hsa_circRNA_020496 | 0.00332539 | 0.091058113 | 3.1513603 | up |
| hsa_circRNA_405624 | 0.024806111 | 0.167916361 | 3.1481937 | down |
| hsa_circRNA_000361 | 0.006682966 | 0.109888046 | 3.1458869 | down |
| hsa_circRNA_405264 | 0.032499634 | 0.183713014 | 3.118852 | up |
| hsa_circRNA_405571 | 0.011915615 | 0.131316139 | 3.1169068 | down |
| hsa_circRNA_001371 | 0.021277493 | 0.158669002 | 3.1086514 | down |
| hsa_circRNA_405950 | 0.02901561 | 0.177976718 | 3.1043539 | down |
| hsa_circRNA_101997 | 0.006110605 | 0.107482485 | 3.1011419 | up |
| hsa_circRNA_406430 | 0.017841607 | 0.150452972 | 3.0889678 | down |
| hsa_circRNA_104511 | 0.049776449 | 0.219452599 | 3.075543 | down |
| hsa_circRNA_406817 | 0.018630204 | 0.151974211 | 3.0731442 | up |
| hsa_circRNA_101578 | 0.001744886 | 0.078843148 | 3.0718373 | up |
| hsa_circRNA_004087 | 0.002502919 | 0.087795729 | 3.0704608 | up |
| hsa_circRNA_404726 | 0.021896963 | 0.159751889 | 3.0685974 | down |
| hsa_circRNA_100558 | 0.007050937 | 0.112408353 | 3.0623185 | up |
| hsa_circRNA_406329 | 0.023317902 | 0.163791978 | 3.0617119 | down |
| hsa_circRNA_400107 | 0.02383947 | 0.165726079 | 3.0589438 | down |
| hsa_circRNA_404918 | 0.021602922 | 0.159390686 | 3.0568439 | up |
| hsa_circRNA_103554 | 0.0060832 | 0.107482485 | 3.0519529 | down |
| hsa_circRNA_044370 | 0.01386334 | 0.136905686 | 3.0433159 | down |
| hsa_circRNA_003545 | 0.013653541 | 0.136495075 | 3.0265265 | up |
| hsa_circRNA_020050 | 0.029294825 | 0.178636109 | 3.017092 | down |
| hsa_circRNA_400043 | 0.004479872 | 0.098733985 | 3.0144495 | down |
| hsa_circRNA_102882 | 0.020347367 | 0.156627247 | 3.0101097 | up |
| hsa_circRNA_083026 | 0.010430812 | 0.125705104 | 2.9976033 | down |
| hsa_circRNA_404682 | 0.00758793 | 0.115291073 | 2.9950448 | up |
| hsa_circRNA_103620 | 0.001827281 | 0.078843148 | 2.9922453 | up |
| hsa_circRNA_000442 | 0.009264119 | 0.120656844 | 2.9881843 | down |
| hsa_circRNA_104161 | 0.006034181 | 0.107421649 | 2.9771891 | up |
| hsa_circRNA_102774 | 0.000572227 | 0.062376236 | 2.9645351 | down |
| hsa_circRNA_004397 | 0.001846695 | 0.078843148 | 2.9628973 | up |
| hsa_circRNA_404571 | 0.013162648 | 0.134218191 | 2.9576633 | down |
| hsa_circRNA_001595 | 0.012884077 | 0.133816626 | 2.9553127 | down |
| hsa_circRNA_103582 | 0.022131704 | 0.160667988 | 2.9547904 | down |
| hsa_circRNA_000829 | 0.009038495 | 0.120008863 | 2.9450339 | down |
| hsa_circRNA_001640 | 0.004309208 | 0.098733985 | 2.9407798 | up |
| hsa_circRNA_400014 | 0.042157852 | 0.202536297 | 2.9325706 | down |
| hsa_circRNA_100258 | 0.038837829 | 0.195586832 | 2.9313803 | up |
| hsa_circRNA_104641 | 0.04619267 | 0.212779661 | 2.9035903 | up |
| hsa_circRNA_101089 | 0.008648647 | 0.118458844 | 2.8967366 | down |
| hsa_circRNA_101164 | 0.000802496 | 0.066531539 | 2.8919218 | down |
| hsa_circRNA_401901 | 0.005484316 | 0.106089254 | 2.8898074 | down |
| hsa_circRNA_104349 | 0.000438054 | 0.060022512 | 2.8897907 | down |
| hsa_circRNA_024615 | 0.009572727 | 0.122370891 | 2.8812525 | up |
| hsa_circRNA_103729 | 0.004531069 | 0.098733985 | 2.8792593 | up |
| hsa_circRNA_084861 | 0.041778518 | 0.201831025 | 2.8786944 | down |
| hsa_circRNA_004300 | 0.037901589 | 0.194283222 | 2.8740861 | down |
| hsa_circRNA_407040 | 0.001633442 | 0.078843148 | 2.8730401 | up |
| hsa_circRNA_404876 | 0.02880929 | 0.177580786 | 2.8722651 | down |
| hsa_circRNA_400961 | 0.019025605 | 0.152785596 | 2.869767 | down |
| hsa_circRNA_051907 | 0.00152587 | 0.078843148 | 2.8693105 | down |
| hsa_circRNA_077760 | 0.002007805 | 0.082792073 | 2.8667339 | down |
| hsa_circRNA_090364 | 0.021402357 | 0.158875057 | 2.8610027 | down |
| hsa_circRNA_026426 | 0.043628032 | 0.205988203 | 2.857213 | down |
| hsa_circRNA_404919 | 0.019183061 | 0.153172111 | 2.8526176 | down |
| hsa_circRNA_400850 | 0.012481465 | 0.133048699 | 2.8521964 | down |
| hsa_circRNA_004036 | 0.003308404 | 0.091058113 | 2.8502379 | down |
| hsa_circRNA_047824 | 0.002157397 | 0.084208885 | 2.8372161 | up |
| hsa_circRNA_102290 | 0.032041598 | 0.183369816 | 2.8329984 | down |
| hsa_circRNA_002625 | 0.00821997 | 0.116640226 | 2.8303721 | up |
| hsa_circRNA_006776 | 0.002058855 | 0.082820134 | 2.8300894 | up |
| hsa_circRNA_100497 | 0.024688731 | 0.167745645 | 2.8217452 | up |
| hsa_circRNA_407270 | 0.015047524 | 0.140578932 | 2.8208779 | down |
| hsa_circRNA_051641 | 0.021553213 | 0.159275819 | 2.820423 | down |
| hsa_circRNA_009078 | 0.019654545 | 0.154601894 | 2.8147977 | down |
| hsa_circRNA_402272 | 0.003283516 | 0.090929185 | 2.8071662 | down |
| hsa_circRNA_100909 | 0.047038333 | 0.214841054 | 2.8023652 | up |
| hsa_circRNA_102432 | 0.028487108 | 0.177256109 | 2.7967411 | down |
| hsa_circRNA_010402 | 0.01066708 | 0.126292206 | 2.7926648 | up |
| hsa_circRNA_404186 | 0.04753871 | 0.215697978 | 2.7914942 | down |
| hsa_circRNA_031210 | 0.003051118 | 0.090269125 | 2.7912655 | down |
| hsa_circRNA_407310 | 0.035813773 | 0.189259397 | 2.7829903 | down |
| hsa_circRNA_000966 | 0.018806412 | 0.152144385 | 2.7805108 | down |
| hsa_circRNA_102746 | 0.022028563 | 0.16026754 | 2.779173 | down |
| hsa_circRNA_405534 | 0.047634966 | 0.215768025 | 2.77652 | up |
| hsa_circRNA_000926 | 0.01144311 | 0.129478858 | 2.771355 | up |
| hsa_circRNA_001214 | 0.006768227 | 0.110458141 | 2.7629355 | up |
| hsa_circRNA_101038 | 0.016245244 | 0.145401612 | 2.7616164 | down |
| hsa_circRNA_000222 | 0.021321165 | 0.158720207 | 2.7553833 | down |
| hsa_circRNA_006692 | 0.018575686 | 0.151974211 | 2.7511993 | down |
| hsa_circRNA_405153 | 0.009282707 | 0.120656844 | 2.7493958 | up |
| hsa_circRNA_103743 | 0.011124251 | 0.128245742 | 2.7440611 | up |
| hsa_circRNA_006294 | 0.047841178 | 0.216161884 | 2.7428331 | up |
| hsa_circRNA_406957 | 0.003249888 | 0.090867244 | 2.739563 | down |
| hsa_circRNA_405776 | 0.002131792 | 0.083706243 | 2.7347644 | down |
| hsa_circRNA_100790 | 0.029540456 | 0.178712772 | 2.7323004 | down |
| hsa_circRNA_006173 | 0.025025408 | 0.168400977 | 2.7322305 | down |
| hsa_circRNA_004662 | 0.010143145 | 0.125157446 | 2.7255907 | up |
| hsa_circRNA_001724 | 0.042149975 | 0.202536297 | 2.7131451 | down |
| hsa_circRNA_003310 | 0.028378519 | 0.176933631 | 2.7019192 | up |
| hsa_circRNA_403789 | 0.019670269 | 0.154601894 | 2.6856507 | up |
| hsa_circRNA_001915 | 0.008119766 | 0.115999129 | 2.6788444 | down |
| hsa_circRNA_405540 | 0.016262787 | 0.145401612 | 2.6752299 | down |
| hsa_circRNA_000207 | 0.003098591 | 0.090269125 | 2.6709437 | down |
| hsa_circRNA_063503 | 0.027581895 | 0.174824247 | 2.666996 | down |
| hsa_circRNA_406347 | 0.004490489 | 0.098733985 | 2.66442 | down |
| hsa_circRNA_103668 | 0.000542629 | 0.062067279 | 2.6622128 | up |
| hsa_circRNA_000178 | 0.02805617 | 0.175677975 | 2.6619962 | down |
| hsa_circRNA_100111 | 0.004583285 | 0.098733985 | 2.6526407 | down |
| hsa_circRNA_000590 | 0.004585898 | 0.098733985 | 2.6515402 | down |
| hsa_circRNA_104692 | 0.00032553 | 0.054525298 | 2.6492343 | up |
| hsa_circRNA_405261 | 0.032341339 | 0.183369816 | 2.647121 | down |
| hsa_circRNA_023787 | 0.012009781 | 0.1315376 | 2.6423898 | down |
| hsa_circRNA_405818 | 0.046095001 | 0.212643174 | 2.6392967 | down |
| hsa_circRNA_404621 | 0.02269079 | 0.162567893 | 2.6307871 | down |
| hsa_circRNA_001240 | 0.002743255 | 0.088843334 | 2.622984 | down |
| hsa_circRNA_100994 | 0.018478618 | 0.151746557 | 2.6222234 | down |
| hsa_circRNA_102378 | 0.002721184 | 0.088819987 | 2.6221304 | up |
| hsa_circRNA_102680 | 0.033231228 | 0.185170564 | 2.6192191 | up |
| hsa_circRNA_102683 | 0.048102556 | 0.216312445 | 2.6138396 | up |
| hsa_circRNA_403397 | 0.017857719 | 0.150452972 | 2.6132316 | down |
| hsa_circRNA_104622 | 0.039012098 | 0.195873239 | 2.6106864 | down |
| hsa_circRNA_404860 | 0.001638618 | 0.078843148 | 2.6079531 | down |
| hsa_circRNA_050263 | 0.013814239 | 0.136625941 | 2.6077646 | up |
| hsa_circRNA_049831 | 0.047313146 | 0.215423024 | 2.5999708 | up |
| hsa_circRNA_403471 | 0.003334198 | 0.091058113 | 2.5935507 | up |
| hsa_circRNA_002953 | 0.007229445 | 0.113246266 | 2.5897919 | down |
| hsa_circRNA_102681 | 0.026310509 | 0.170907868 | 2.5862904 | up |
| hsa_circRNA_100789 | 0.0257687 | 0.170161386 | 2.5829264 | down |
| hsa_circRNA_100434 | 0.021271862 | 0.158669002 | 2.5750511 | up |
| hsa_circRNA_103978 | 1.22617E-05 | 0.034364562 | 2.573906 | up |
| hsa_circRNA_102678 | 0.027249028 | 0.174166041 | 2.5717637 | up |
| hsa_circRNA_047713 | 0.002146412 | 0.084029489 | 2.5651613 | down |
| hsa_circRNA_406075 | 0.017069463 | 0.148009418 | 2.5612861 | down |
| hsa_circRNA_406799 | 0.019876456 | 0.155535336 | 2.5572738 | down |
| hsa_circRNA_406837 | 0.032329614 | 0.183369816 | 2.5489238 | down |
| hsa_circRNA_037621 | 0.018215301 | 0.150907545 | 2.5480016 | down |
| hsa_circRNA_100810 | 0.017885923 | 0.150452972 | 2.5458402 | down |
| hsa_circRNA_081199 | 0.013222247 | 0.134513101 | 2.5434537 | down |
| hsa_circRNA_405241 | 0.000301755 | 0.054021958 | 2.543374 | down |
| hsa_circRNA_405873 | 0.008838807 | 0.119205208 | 2.5343137 | up |
| hsa_circRNA_100833 | 0.00066614 | 0.06303885 | 2.5314507 | up |
| hsa_circRNA_000782 | 0.003005239 | 0.089992746 | 2.5241674 | up |
| hsa_circRNA_100878 | 0.001129117 | 0.072732828 | 2.5239076 | down |
| hsa_circRNA_003907 | 0.038237948 | 0.195057711 | 2.5133633 | down |
| hsa_circRNA_100432 | 0.02330082 | 0.163791978 | 2.5110992 | up |
| hsa_circRNA_011977 | 0.016617014 | 0.147019406 | 2.5099766 | down |
| hsa_circRNA_005048 | 0.041852836 | 0.201831025 | 2.5067632 | down |
| hsa_circRNA_102747 | 0.008422806 | 0.11811683 | 2.506041 | up |
| hsa_circRNA_100987 | 0.036147674 | 0.190270711 | 2.5010905 | up |
| hsa_circRNA_006910 | 0.03869392 | 0.195430758 | 2.500307 | down |
| hsa_circRNA_102237 | 0.049911428 | 0.21965036 | 2.4958696 | down |
| hsa_circRNA_092556 | 1.56653E-05 | 0.034364562 | 2.4952429 | up |
| hsa_circRNA_025636 | 0.009362486 | 0.120768884 | 2.4932783 | down |
| hsa_circRNA_100838 | 0.002648564 | 0.088334608 | 2.4860467 | down |
| hsa_circRNA_064335 | 0.00359615 | 0.093136243 | 2.484422 | up |
| hsa_circRNA_100956 | 0.03741313 | 0.193377344 | 2.4842974 | up |
| hsa_circRNA_002145 | 0.011474563 | 0.129478858 | 2.4826257 | down |
| hsa_circRNA_404539 | 0.034224995 | 0.186891188 | 2.4821265 | down |
| hsa_circRNA_406704 | 0.045114944 | 0.210216782 | 2.4800427 | up |
| hsa_circRNA_100908 | 0.045220433 | 0.210261428 | 2.4798752 | up |
| hsa_circRNA_029554 | 0.043525502 | 0.205799586 | 2.4760896 | down |
| hsa_circRNA_005824 | 0.005801399 | 0.106632303 | 2.4725947 | down |
| hsa_circRNA_049536 | 0.0147247 | 0.139344389 | 2.4693102 | down |
| hsa_circRNA_001781 | 0.033131681 | 0.184980529 | 2.4687646 | down |
| hsa_circRNA_000694 | 0.034970256 | 0.188025311 | 2.4671303 | down |
| hsa_circRNA_004286 | 0.004299127 | 0.098733985 | 2.4649295 | up |
| hsa_circRNA_026129 | 0.012575137 | 0.133505528 | 2.4591231 | down |
| hsa_circRNA_405164 | 0.008652583 | 0.118458844 | 2.457808 | down |
| hsa_circRNA_091669 | 0.00265427 | 0.088334608 | 2.4556564 | up |
| hsa_circRNA_104471 | 0.029003668 | 0.177976718 | 2.4458826 | down |
| hsa_circRNA_103328 | 0.020935376 | 0.158357637 | 2.4457782 | down |
| hsa_circRNA_000510 | 0.008033881 | 0.115747728 | 2.445006 | down |
| hsa_circRNA_101633 | 0.018460533 | 0.151746557 | 2.4407431 | up |
| hsa_circRNA_052522 | 0.004240908 | 0.098628691 | 2.439628 | up |
| hsa_circRNA_404091 | 0.025946925 | 0.170462913 | 2.4378893 | down |
| hsa_circRNA_406888 | 0.015200335 | 0.141805112 | 2.4357075 | down |
| hsa_circRNA_101083 | 0.00631681 | 0.108051126 | 2.4335651 | up |
| hsa_circRNA_101030 | 0.035743784 | 0.189259397 | 2.4305539 | down |
| hsa_circRNA_075706 | 0.00269244 | 0.088334608 | 2.429672 | down |
| hsa_circRNA_407272 | 0.011913627 | 0.131316139 | 2.426824 | down |
| hsa_circRNA_053882 | 0.002026221 | 0.082820134 | 2.4204287 | down |
| hsa_circRNA_101119 | 0.00072637 | 0.064997719 | 2.4176653 | up |
| hsa_circRNA_406937 | 0.020836844 | 0.157975703 | 2.4137933 | down |
| hsa_circRNA_404289 | 0.000559103 | 0.06235226 | 2.4136308 | up |
| hsa_circRNA_102805 | 0.000154155 | 0.048279809 | 2.4118453 | down |
| hsa_circRNA_406750 | 0.023977282 | 0.165748888 | 2.4073864 | down |
| hsa_circRNA_103608 | 0.033583823 | 0.185622638 | 2.3985217 | down |
| hsa_circRNA_059571 | 0.009733817 | 0.123828467 | 2.3968409 | down |
| hsa_circRNA_102122 | 0.000141504 | 0.046533719 | 2.3940753 | down |
| hsa_circRNA_104244 | 0.01053603 | 0.125705104 | 2.3900358 | up |
| hsa_circRNA_061687 | 0.004505559 | 0.098733985 | 2.3888427 | up |
| hsa_circRNA_406319 | 0.013624807 | 0.136393236 | 2.3868571 | down |
| hsa_circRNA_102685 | 0.004474609 | 0.098733985 | 2.3863221 | up |
| hsa_circRNA_100735 | 0.01373811 | 0.136574871 | 2.3845334 | up |
| hsa_circRNA_003826 | 0.003897901 | 0.095480437 | 2.3838891 | up |
| hsa_circRNA_101082 | 0.003856151 | 0.095187701 | 2.3833824 | up |
| hsa_circRNA_101180 | 0.025663163 | 0.170049104 | 2.3794137 | down |
| hsa_circRNA_005575 | 0.005078921 | 0.102781737 | 2.3782946 | down |
| hsa_circRNA_006491 | 0.024912044 | 0.168119136 | 2.3772631 | down |
| hsa_circRNA_000773 | 0.029827309 | 0.178902247 | 2.3739239 | up |
| hsa_circRNA_100566 | 4.22106E-05 | 0.046533719 | 2.373898 | up |
| hsa_circRNA_045850 | 0.002904329 | 0.089799175 | 2.372736 | up |
| hsa_circRNA_040319 | 0.004304463 | 0.098733985 | 2.3718327 | up |
| hsa_circRNA_102469 | 0.018635731 | 0.151974211 | 2.3714695 | up |
| hsa_circRNA_074368 | 0.01763015 | 0.14971604 | 2.3710505 | up |
| hsa_circRNA_404961 | 0.000724534 | 0.064997719 | 2.3658965 | down |
| hsa_circRNA_001302 | 0.036693518 | 0.191602171 | 2.3621041 | down |
| hsa_circRNA_101504 | 0.02566987 | 0.170049104 | 2.3617689 | up |
| hsa_circRNA_059760 | 0.038453665 | 0.195057711 | 2.3597321 | down |
| hsa_circRNA_406725 | 0.011092452 | 0.128103701 | 2.3580637 | down |
| hsa_circRNA_023928 | 0.039904936 | 0.197706036 | 2.3559541 | up |
| hsa_circRNA_000055 | 0.008415432 | 0.11811683 | 2.3552291 | down |
| hsa_circRNA_406017 | 0.016495394 | 0.146213212 | 2.3540891 | down |
| hsa_circRNA_103629 | 0.009050387 | 0.120008863 | 2.3529387 | up |
| hsa_circRNA_102639 | 0.00052596 | 0.061753328 | 2.3508641 | down |
| hsa_circRNA_405275 | 0.017985724 | 0.150518085 | 2.3507926 | down |
| hsa_circRNA_405152 | 0.000249031 | 0.05387132 | 2.3486618 | up |
| hsa_circRNA_002641 | 0.031548914 | 0.182017307 | 2.3477775 | up |
| hsa_circRNA_102468 | 0.021087159 | 0.158669002 | 2.3468767 | up |
| hsa_circRNA_025984 | 0.043254315 | 0.205189667 | 2.3467598 | down |
| hsa_circRNA_405007 | 0.006246204 | 0.108021592 | 2.345319 | down |
| hsa_circRNA_026468 | 0.001248061 | 0.074140488 | 2.3450471 | down |
| hsa_circRNA_005895 | 0.001729547 | 0.078843148 | 2.3440679 | up |
| hsa_circRNA_406736 | 0.017111508 | 0.148009418 | 2.3387768 | down |
| hsa_circRNA_103333 | 0.04722574 | 0.215174016 | 2.3379494 | up |
| hsa_circRNA_103674 | 0.016744473 | 0.147316409 | 2.3379435 | down |
| hsa_circRNA_100145 | 0.007633719 | 0.115291073 | 2.3372762 | up |
| hsa_circRNA_103618 | 0.012795934 | 0.133816626 | 2.3353559 | down |
| hsa_circRNA_001552 | 0.00047484 | 0.061753328 | 2.3332588 | up |
| hsa_circRNA_000758 | 0.000211359 | 0.053208408 | 2.3311156 | up |
| hsa_circRNA_100787 | 0.027964176 | 0.175580323 | 2.3294991 | down |
| hsa_circRNA_100915 | 0.009889203 | 0.124463743 | 2.329151 | up |
| hsa_circRNA_005187 | 0.010766787 | 0.126557305 | 2.3263775 | down |
| hsa_circRNA_102385 | 0.000465834 | 0.061275828 | 2.3253338 | down |
| hsa_circRNA_101403 | 0.011259201 | 0.128785676 | 2.3230744 | down |
| hsa_circRNA_000639 | 0.018014855 | 0.150518085 | 2.3224227 | down |
| hsa_circRNA_406564 | 0.000435733 | 0.060022512 | 2.3205075 | down |
| hsa_circRNA_042806 | 0.011082004 | 0.128095504 | 2.3188814 | up |
| hsa_circRNA_091558 | 0.019615926 | 0.154507719 | 2.3175353 | up |
| hsa_circRNA_103726 | 0.004606689 | 0.098733985 | 2.3131898 | down |
| hsa_circRNA_001233 | 0.008112443 | 0.115999129 | 2.3113887 | down |
| hsa_circRNA_005178 | 0.016700229 | 0.147316409 | 2.3109432 | up |
| hsa_circRNA_061260 | 0.021297491 | 0.158687071 | 2.3106808 | down |
| hsa_circRNA_100016 | 0.005817349 | 0.106632303 | 2.308098 | up |
| hsa_circRNA_051640 | 0.030824659 | 0.179931653 | 2.304257 | down |
| hsa_circRNA_104243 | 0.020241858 | 0.156532278 | 2.3034491 | up |
| hsa_circRNA_406464 | 0.040595915 | 0.199030438 | 2.3033961 | down |
| hsa_circRNA_406993 | 0.001775993 | 0.078843148 | 2.300279 | down |
| hsa_circRNA_101613 | 0.010000041 | 0.124463743 | 2.2990688 | up |
| hsa_circRNA_001880 | 0.016670403 | 0.147316409 | 2.2983315 | up |
| hsa_circRNA_103403 | 0.00423491 | 0.098628691 | 2.2980631 | down |
| hsa_circRNA_105039 | 0.02119457 | 0.158669002 | 2.297736 | up |
| hsa_circRNA_101460 | 0.032056359 | 0.183369816 | 2.293238 | down |
| hsa_circRNA_005989 | 0.002650376 | 0.088334608 | 2.2914299 | up |
| hsa_circRNA_101445 | 0.027652821 | 0.174824247 | 2.2903167 | up |
| hsa_circRNA_405974 | 0.012927385 | 0.133816626 | 2.289361 | down |
| hsa_circRNA_007661 | 0.008809011 | 0.119205208 | 2.2875593 | up |
| hsa_circRNA_403797 | 0.00098517 | 0.070460854 | 2.2871903 | down |
| hsa_circRNA_102940 | 0.010459816 | 0.125705104 | 2.2864916 | up |
| hsa_circRNA_002125 | 0.019458889 | 0.153915949 | 2.2803024 | up |
| hsa_circRNA_103039 | 0.029537197 | 0.178712772 | 2.2800023 | down |
| hsa_circRNA_101014 | 0.022757611 | 0.16260381 | 2.2791159 | up |
| hsa_circRNA_075671 | 0.034489329 | 0.186891188 | 2.2785666 | up |
| hsa_circRNA_100353 | 0.023810257 | 0.165714347 | 2.2760806 | up |
| hsa_circRNA_001547 | 0.019663954 | 0.154601894 | 2.271604 | down |
| hsa_circRNA_101632 | 0.025375286 | 0.169262938 | 2.2667604 | up |
| hsa_circRNA_082547 | 0.006574075 | 0.109679817 | 2.2666033 | up |
| hsa_circRNA_104106 | 0.003501613 | 0.092898664 | 2.2638757 | down |
| hsa_circRNA_037205 | 0.000936191 | 0.070202977 | 2.2620671 | down |
| hsa_circRNA_400037 | 0.004804428 | 0.100175131 | 2.2598132 | down |
| hsa_circRNA_405621 | 2.19529E-05 | 0.034364562 | 2.2573894 | down |
| hsa_circRNA_001269 | 0.005879114 | 0.106963189 | 2.2508075 | up |
| hsa_circRNA_104982 | 0.026827365 | 0.172776564 | 2.2471209 | down |
| hsa_circRNA_009213 | 0.003848266 | 0.095187701 | 2.2453954 | down |
| hsa_circRNA_102810 | 0.048233344 | 0.216465852 | 2.2441235 | down |
| hsa_circRNA_406246 | 0.02481598 | 0.167916361 | 2.2436221 | down |
| hsa_circRNA_102787 | 0.000665034 | 0.06303885 | 2.2430991 | up |
| hsa_circRNA_003265 | 0.010076984 | 0.124936126 | 2.2402942 | up |
| hsa_circRNA_102686 | 0.007183319 | 0.112889436 | 2.2399398 | up |
| hsa_circRNA_103329 | 0.041326091 | 0.201129437 | 2.2345676 | down |
| hsa_circRNA_104347 | 8.29171E-05 | 0.046533719 | 2.2323584 | up |
| hsa_circRNA_102470 | 0.043335559 | 0.205344256 | 2.2322782 | down |
| hsa_circRNA_103628 | 0.001201683 | 0.073864222 | 2.2275057 | up |
| hsa_circRNA_405286 | 0.010190101 | 0.125271574 | 2.2272191 | up |
| hsa_circRNA_025489 | 0.020530604 | 0.157375365 | 2.2238044 | up |
| hsa_circRNA_403286 | 0.020327991 | 0.156627247 | 2.2230148 | down |
| hsa_circRNA_406380 | 0.02414844 | 0.165873929 | 2.2208962 | down |
| hsa_circRNA_018086 | 0.019843614 | 0.155463307 | 2.2190379 | up |
| hsa_circRNA_022917 | 0.024952165 | 0.168145891 | 2.2129126 | down |
| hsa_circRNA_000629 | 0.008599244 | 0.118458844 | 2.2110245 | down |
| hsa_circRNA_074598 | 0.024926257 | 0.168119136 | 2.2102905 | up |
| hsa_circRNA_406989 | 0.000808842 | 0.066531539 | 2.2086242 | down |
| hsa_circRNA_104068 | 0.016782406 | 0.147316409 | 2.2070583 | down |
| hsa_circRNA_400187 | 0.005069935 | 0.102781737 | 2.2069696 | down |
| hsa_circRNA_074595 | 0.041965567 | 0.201993869 | 2.2067801 | up |
| hsa_circRNA_100889 | 0.015816273 | 0.14407705 | 2.2061702 | up |
| hsa_circRNA_405804 | 0.013796991 | 0.136609519 | 2.2058218 | up |
| hsa_circRNA_092458 | 0.019067013 | 0.152883889 | 2.2055145 | up |
| hsa_circRNA_406839 | 0.002341689 | 0.087039066 | 2.2049815 | down |
| hsa_circRNA_404891 | 0.001573334 | 0.078843148 | 2.2029596 | down |
| hsa_circRNA_102379 | 0.0301818 | 0.179486558 | 2.2028426 | up |
| hsa_circRNA_100910 | 0.005216697 | 0.104158238 | 2.2023857 | up |
| hsa_circRNA_102689 | 0.004073487 | 0.096987777 | 2.2019726 | up |
| hsa_circRNA_101987 | 1.94489E-05 | 0.034364562 | 2.2005985 | down |
| hsa_circRNA_406470 | 0.025346471 | 0.169201026 | 2.2002478 | up |
| hsa_circRNA_100911 | 0.005787429 | 0.106632303 | 2.1996912 | up |
| hsa_circRNA_101629 | 0.002601195 | 0.088334608 | 2.1970944 | up |
| hsa_circRNA_406325 | 0.012456844 | 0.133048699 | 2.1937712 | down |
| hsa_circRNA_405398 | 0.012879627 | 0.133816626 | 2.1923175 | up |
| hsa_circRNA_007408 | 0.004413554 | 0.098733985 | 2.1903569 | up |
| hsa_circRNA_103859 | 0.007166088 | 0.112889436 | 2.1865436 | up |
| hsa_circRNA_100974 | 0.015917693 | 0.144400924 | 2.1857429 | up |
| hsa_circRNA_028883 | 0.00690629 | 0.11146667 | 2.1853773 | down |
| hsa_circRNA_100337 | 0.010581212 | 0.125731947 | 2.1840137 | up |
| hsa_circRNA_001403 | 0.010724758 | 0.126296748 | 2.1838036 | up |
| hsa_circRNA_016363 | 0.002761881 | 0.088843334 | 2.1781358 | down |
| hsa_circRNA_404465 | 0.003279749 | 0.090929185 | 2.1773921 | down |
| hsa_circRNA_400661 | 0.043234283 | 0.205189667 | 2.1734482 | up |
| hsa_circRNA_405426 | 0.001101591 | 0.072732828 | 2.1698211 | down |
| hsa_circRNA_406558 | 0.034483153 | 0.186891188 | 2.1692932 | up |
| hsa_circRNA_101550 | 0.01306455 | 0.134162973 | 2.1691036 | up |
| hsa_circRNA_405324 | 0.014901024 | 0.139806044 | 2.1686312 | down |
| hsa_circRNA_057659 | 0.002482779 | 0.087795729 | 2.1686004 | down |
| hsa_circRNA_102112 | 0.02130465 | 0.158687071 | 2.1684228 | up |
| hsa_circRNA_006019 | 0.007661462 | 0.115291073 | 2.1642346 | down |
| hsa_circRNA_078352 | 0.013903605 | 0.137097466 | 2.163487 | down |
| hsa_circRNA_020622 | 0.001757154 | 0.078843148 | 2.1632431 | down |
| hsa_circRNA_003267 | 0.016743425 | 0.147316409 | 2.1619501 | down |
| hsa_circRNA_100662 | 0.021270905 | 0.158669002 | 2.1586913 | up |
| hsa_circRNA_001401 | 0.004806184 | 0.100175131 | 2.1545072 | down |
| hsa_circRNA_088614 | 0.008819176 | 0.119205208 | 2.1483059 | up |
| hsa_circRNA_103912 | 0.011828713 | 0.131082465 | 2.1482714 | up |
| hsa_circRNA_092382 | 0.025126982 | 0.168632815 | 2.1481107 | up |
| hsa_circRNA_406986 | 0.002500044 | 0.087795729 | 2.1463364 | down |
| hsa_circRNA_103584 | 0.016407972 | 0.145660751 | 2.1455702 | up |
| hsa_circRNA_103676 | 0.000845546 | 0.067818952 | 2.1451897 | down |
| hsa_circRNA_053955 | 0.013967393 | 0.137333755 | 2.1385304 | up |
| hsa_circRNA_002044 | 0.021757199 | 0.159739831 | 2.1362627 | up |
| hsa_circRNA_102705 | 0.004499434 | 0.098733985 | 2.1358204 | down |
| hsa_circRNA_103336 | 0.018610835 | 0.151974211 | 2.134642 | down |
| hsa_circRNA_105034 | 0.003163735 | 0.090269125 | 2.1314932 | up |
| hsa_circRNA_027610 | 0.023251785 | 0.163791978 | 2.1309245 | down |
| hsa_circRNA_102017 | 0.02736749 | 0.174258844 | 2.1287732 | up |
| hsa_circRNA_103831 | 0.02068221 | 0.157695764 | 2.1280606 | up |
| hsa_circRNA_000479 | 0.018444256 | 0.151746557 | 2.1275972 | up |
| hsa_circRNA_029375 | 0.002762424 | 0.088843334 | 2.1270414 | down |
| hsa_circ_0007765 | 0.030705829 | 0.179931653 | 2.1261755 | up |
| hsa_circRNA_102612 | 0.002425033 | 0.08748991 | 2.1253811 | up |
| hsa_circRNA_102714 | 0.00164434 | 0.078843148 | 2.1235304 | down |
| hsa_circRNA_104643 | 0.012501763 | 0.133048699 | 2.1190402 | up |
| hsa_circRNA_403687 | 0.015707564 | 0.143694485 | 2.1186917 | down |
| hsa_circRNA_406455 | 0.001600649 | 0.078843148 | 2.1167892 | down |
| hsa_circRNA_004878 | 0.001505409 | 0.078843148 | 2.1136639 | down |
| hsa_circRNA_100019 | 0.016201304 | 0.145171629 | 2.113457 | up |
| hsa_circRNA_104562 | 0.015815627 | 0.14407705 | 2.1124252 | up |
| hsa_circRNA_104417 | 0.04863711 | 0.217535716 | 2.1114582 | up |
| hsa_circRNA_405796 | 0.020584909 | 0.157426679 | 2.1113553 | down |
| hsa_circRNA_100504 | 0.014452951 | 0.138874824 | 2.1111298 | up |
| hsa_circRNA_401230 | 0.00437986 | 0.098733985 | 2.1089906 | up |
| hsa_circRNA_104346 | 0.020773037 | 0.157855883 | 2.1086442 | up |
| hsa_circRNA_406821 | 0.035159509 | 0.188232878 | 2.1070167 | down |
| hsa_circRNA_002375 | 0.021424779 | 0.158951804 | 2.1069846 | up |
| hsa_circRNA_100132 | 0.019232363 | 0.153172111 | 2.1060071 | up |
| hsa_circRNA_001766 | 0.001949006 | 0.081307632 | 2.1054059 | up |
| hsa_circRNA_013755 | 0.038650413 | 0.195315992 | 2.1050219 | up |
| hsa_circRNA_404090 | 0.003098572 | 0.090269125 | 2.1039435 | down |
| hsa_circRNA_102523 | 0.01935196 | 0.153616921 | 2.1029916 | up |
| hsa_circRNA_100011 | 0.040999694 | 0.200189302 | 2.1018712 | up |
| hsa_circRNA_405330 | 0.013073391 | 0.134162973 | 2.101507 | up |
| hsa_circRNA_104573 | 0.001388403 | 0.077801846 | 2.099715 | up |
| hsa_circRNA_400326 | 0.007259302 | 0.113542043 | 2.0995643 | up |
| hsa_circRNA_017645 | 0.02999334 | 0.179088697 | 2.0970323 | up |
| hsa_circRNA_104134 | 0.005248228 | 0.104158238 | 2.096226 | down |
| hsa_circRNA_004065 | 0.000262121 | 0.05387132 | 2.0914675 | down |
| hsa_circRNA_102456 | 0.014676391 | 0.139241824 | 2.0912035 | down |
| hsa_circRNA_104193 | 0.043097866 | 0.204936794 | 2.0905895 | down |
| hsa_circRNA_000750 | 0.001128874 | 0.072732828 | 2.0895437 | down |
| hsa_circRNA_100913 | 0.036424934 | 0.191042101 | 2.0888617 | up |
| hsa_circRNA_075900 | 0.012027747 | 0.131582845 | 2.0877356 | down |
| hsa_circRNA_065702 | 0.000535189 | 0.061753328 | 2.0873092 | down |
| hsa_circRNA_000551 | 0.018476637 | 0.151746557 | 2.0845374 | down |
| hsa_circRNA_101159 | 0.022805505 | 0.162857552 | 2.0841074 | down |
| hsa_circRNA_074834 | 0.02407575 | 0.165873929 | 2.0820183 | down |
| hsa_circRNA_001464 | 0.047442188 | 0.215628349 | 2.0783138 | up |
| hsa_circRNA_102001 | 0.016185344 | 0.145171629 | 2.0774973 | up |
| hsa_circRNA_405129 | 0.033947266 | 0.186473041 | 2.0756828 | up |
| hsa_circRNA_102841 | 0.040339795 | 0.198514653 | 2.0740258 | up |
| hsa_circRNA_104076 | 0.02462755 | 0.167745645 | 2.0738395 | up |
| hsa_circRNA_092500 | 0.003623997 | 0.093472032 | 2.0733474 | up |
| hsa_circRNA_405432 | 0.026139135 | 0.170579154 | 2.0710735 | down |
| hsa_circRNA_104705 | 0.021460663 | 0.159128276 | 2.0695991 | up |
| hsa_circRNA_060176 | 0.028313022 | 0.176796062 | 2.0690082 | down |
| hsa_circRNA_001589 | 0.030997025 | 0.180280952 | 2.0689667 | up |
| hsa_circRNA_104524 | 0.008148817 | 0.116046249 | 2.0679149 | down |
| hsa_circRNA_101290 | 0.001661568 | 0.078843148 | 2.0676886 | down |
| hsa_circRNA_003086 | 0.00384238 | 0.095187701 | 2.0639572 | down |
| hsa_circRNA_015816 | 0.000333643 | 0.054525298 | 2.0630243 | down |
| hsa_circRNA_406320 | 0.04742236 | 0.21562175 | 2.0629501 | up |
| hsa_circRNA_102018 | 0.026187685 | 0.170615559 | 2.0615161 | up |
| hsa_circRNA_401389 | 0.017314861 | 0.14818457 | 2.0610105 | up |
| hsa_circRNA_102377 | 0.015780942 | 0.144043344 | 2.0584122 | up |
| hsa_circRNA_009550 | 0.004144437 | 0.097558365 | 2.0579441 | down |
| hsa_circRNA_020960 | 0.024638525 | 0.167745645 | 2.0561241 | down |
| hsa_circRNA_102345 | 0.002613011 | 0.088334608 | 2.0559399 | down |
| hsa_circRNA_042451 | 0.000240825 | 0.05387132 | 2.054241 | up |
| hsa_circRNA_406838 | 0.036406285 | 0.191020452 | 2.0540888 | down |
| hsa_circRNA_103210 | 0.032463371 | 0.183586923 | 2.0523559 | up |
| hsa_circRNA_000569 | 0.014075025 | 0.137433281 | 2.0516549 | down |
| hsa_circRNA_102712 | 0.015896702 | 0.144400924 | 2.0515535 | up |
| hsa_circRNA_103502 | 0.005335239 | 0.104278945 | 2.0514904 | down |
| hsa_circRNA_100748 | 0.00089854 | 0.069882457 | 2.0514764 | down |
| hsa_circRNA_001533 | 0.021488811 | 0.159157554 | 2.0509614 | down |
| hsa_circRNA_402255 | 0.002491447 | 0.087795729 | 2.047157 | down |
| hsa_circRNA_074535 | 0.010540527 | 0.125705104 | 2.0468256 | down |
| hsa_circRNA_100659 | 0.003841181 | 0.095187701 | 2.0450638 | down |
| hsa_circRNA_102638 | 0.000189695 | 0.050923295 | 2.0433071 | up |
| hsa_circRNA_000336 | 0.000139544 | 0.046533719 | 2.0417984 | down |
| hsa_circRNA_406557 | 0.008612037 | 0.118458844 | 2.0417366 | up |
| hsa_circRNA_029031 | 0.006659736 | 0.109888046 | 2.039753 | down |
| hsa_circRNA_403141 | 0.019566436 | 0.154302699 | 2.0394126 | down |
| hsa_circRNA_101401 | 0.022307931 | 0.161420605 | 2.0381491 | down |
| hsa_circRNA_074660 | 0.018551685 | 0.151974211 | 2.0373639 | down |
| hsa_circRNA_008382 | 0.00911135 | 0.120216644 | 2.0357404 | up |
| hsa_circRNA_001387 | 0.021225374 | 0.158669002 | 2.032642 | up |
| hsa_circRNA_101249 | 0.00299012 | 0.089799175 | 2.0307215 | down |
| hsa_circRNA_101303 | 0.035827798 | 0.189259397 | 2.0292239 | up |
| hsa_circRNA_069443 | 0.033202102 | 0.18513796 | 2.0287832 | up |
| hsa_circRNA_103858 | 0.009950229 | 0.124463743 | 2.0283304 | up |
| hsa_circRNA_001648 | 0.040048597 | 0.197707104 | 2.0278579 | up |
| hsa_circRNA_002131 | 0.004137757 | 0.097558365 | 2.0258771 | down |
| hsa_circRNA_001995 | 0.011769437 | 0.130866584 | 2.0252543 | up |
| hsa_circRNA_100631 | 0.000589981 | 0.062376236 | 2.0244788 | down |
| hsa_circRNA_405323 | 0.002354056 | 0.087039066 | 2.0239289 | up |
| hsa_circRNA_012384 | 0.006692424 | 0.109902801 | 2.0221829 | down |
| hsa_circRNA_406865 | 0.023389061 | 0.164085175 | 2.0214246 | down |
| hsa_circRNA_007541 | 0.006031771 | 0.107421649 | 2.0206944 | up |
| hsa_circRNA_000711 | 0.032239714 | 0.183369816 | 2.0194182 | down |
| hsa_circRNA_403604 | 0.001122871 | 0.072732828 | 2.0171717 | down |
| hsa_circRNA_100035 | 0.016703997 | 0.147316409 | 2.0169063 | down |
| hsa_circRNA_103393 | 0.021125945 | 0.158669002 | 2.0164045 | up |
| hsa_circRNA_103781 | 0.001439991 | 0.077949144 | 2.01553 | down |
| hsa_circRNA_058619 | 0.042561226 | 0.203656008 | 2.0152107 | up |
| hsa_circRNA_402768 | 0.009311369 | 0.120727237 | 2.0150507 | down |
| hsa_circRNA_045871 | 0.009041589 | 0.120008863 | 2.012986 | down |
| hsa_circRNA_000762 | 0.002970546 | 0.089799175 | 2.0124277 | up |
| hsa_circRNA_077218 | 0.001607092 | 0.078843148 | 2.0107844 | down |
| hsa_circRNA_031607 | 0.031557012 | 0.182017307 | 2.0107178 | up |
| hsa_circRNA_001588 | 0.004429887 | 0.098733985 | 2.0105046 | up |
| hsa_circRNA_405781 | 0.040438785 | 0.198779336 | 2.0103721 | down |
| hsa_circRNA_101756 | 0.008634019 | 0.118458844 | 2.0098763 | down |
| hsa_circRNA_077877 | 0.045451437 | 0.210888257 | 2.0089203 | down |
| hsa_circRNA_044171 | 0.024562466 | 0.167580228 | 2.0087609 | down |
| hsa_circRNA_059500 | 0.034070297 | 0.186578139 | 2.0087088 | down |
| hsa_circRNA_104822 | 0.005868251 | 0.106963189 | 2.0078211 | up |
| hsa_circRNA_102335 | 0.007390943 | 0.114511744 | 2.0078206 | down |
| hsa_circRNA_101257 | 0.008871497 | 0.119292546 | 2.0068816 | down |
| hsa_circRNA_404904 | 0.005681762 | 0.106632303 | 2.0047642 | down |
| hsa_circRNA_065649 | 0.003346917 | 0.091058113 | 2.0046632 | up |
| hsa_circRNA_407012 | 0.000944891 | 0.070202977 | 2.0043738 | down |
| hsa_circRNA_100827 | 0.001720174 | 0.078843148 | 2.0022529 | down |
| hsa_circRNA_102433 | 0.001068434 | 0.072732828 | 2.0007494 | up |
| hsa_circRNA_103551 | 0.006423552 | 0.108671245 | 2.0003878 | down |

**Supplementary Table 2 The differential expression results of mirRNAs.**

| miRNA_ID | P.Value | logFC | Regulation |
| --- | --- | --- | --- |
| hsa-miR-642a-5p | 0.11533051 | 1.51 | Up |
| hsa-miR-215-5p | 0.05771903 | 1.5 | Up |
| hsa-miR-631 | 0.02651392 | 1.44 | Up |
| hsa-miR-34b-3p | 0.03460393 | 1.44 | Up |
| hsa-miR-200a-5p | 0.01957089 | 1.4 | Up |
| hsa-miR-6069 | 0.14187709 | 1.15 | Up |
| hsa-miR-1538 | 0.05067926 | 1.14 | Up |
| hsa-miR-652-5p | 0.02025578 | 1.12 | Up |
| hsa-mir-4540 | 0.03982879 | 1.07 | Up |
| hsa-miR-1827 | 0.04873611 | 1.07 | Up |
| hsa-miR-6511b-3p | 0.00328373 | 1.05 | Up |
| hsa-miR-5579-3p | 0.01191909 | 1.04 | Up |
| hsa-miR-139-3p | 0.10437843 | 1.03 | Up |
| hsa-miR-4733-3p | 0.0250513 | 1.02 | Up |
| hsa-miR-615-3p | 0.09745546 | 1.01 | Up |
| hsa-miR-6738-3p | 0.07475158 | 1 | Up |
| hsa-miR-5705 | 0.04438626 | 9.96E-01 | Up |
| hsa-miR-4445-5p | 0.11153839 | 9.81E-01 | Up |
| hsa-mir-4734 | 0.01011565 | 9.76E-01 | Up |
| hsa-miR-1255b-2-3p | 0.08470825 | 9.76E-01 | Up |
| hsa-miR-452-3p | 0.02500423 | 9.73E-01 | Up |
| hsa-miR-29b-2-5p | 0.06173544 | 9.52E-01 | Up |
| hsa-mir-224 | 0.07745928 | 9.50E-01 | Up |
| hsa-miR-326 | 0.02121455 | 9.39E-01 | Up |
| hsa-miR-6883-5p | 0.07573175 | 9.28E-01 | Up |
| hsa-miR-4740-5p | 0.04547607 | 9.09E-01 | Up |
| hsa-miR-134-3p | 0.08878232 | 9.09E-01 | Up |
| hsa-mir-452 | 0.0601524 | 8.97E-01 | Up |
| hsa-mir-585 | 0.13197768 | 8.95E-01 | Up |
| hsa-miR-26b-3p | 0.0459702 | 8.94E-01 | Up |
| hsa-miR-4708-5p | 0.0351479 | 8.86E-01 | Up |
| hsa-mir-4460 | 0.02067805 | 8.69E-01 | Up |
| hsa-miR-6733-3p | 0.12089451 | 8.68E-01 | Up |
| hsa-miR-891a-3p | 0.04387868 | 8.65E-01 | Up |
| hsa-miR-7973 | 0.03446011 | 8.61E-01 | Up |
| hsa-miR-1228-3p | 0.04912648 | 8.56E-01 | Up |
| hsa-mir-219b | 0.03255393 | 8.47E-01 | Up |
| hsa-miR-4723-5p | 0.05030597 | 8.45E-01 | Up |
| hsa-miR-6885-5p | 0.05784289 | 8.42E-01 | Up |
| hsa-miR-4704-3p | 0.03678677 | 8.34E-01 | Up |
| hsa-mir-106a | 0.05252524 | 8.33E-01 | Up |
| hsa-miR-216b-5p | 0.02351426 | 8.32E-01 | Up |
| hsa-miR-3940-3p | 0.02671611 | 8.27E-01 | Up |
| hsa-miR-4769-3p | 0.15473888 | 8.27E-01 | Up |
| hsa-miR-210-3p | 0.01402093 | 8.16E-01 | Up |
| hsa-miR-548q | 0.03029361 | 8.16E-01 | Up |
| hsa-miR-5006-3p | 0.06059735 | 8.11E-01 | Up |
| hsa-miR-6808-3p | 0.05764729 | 8.08E-01 | Up |
| hsa-mir-139 | 0.05699173 | 8.07E-01 | Up |
| hsa-mir-1226 | 0.00852269 | 8.00E-01 | Up |
| hsa-miR-449a | 0.02931486 | 8.00E-01 | Up |
| hsa-miR-4320 | 0.05987438 | 8.00E-01 | Up |
| hsa-mir-365a | 0.02240279 | 7.96E-01 | Up |
| hsa-miR-6836-3p | 0.04241797 | 7.94E-01 | Up |
| hsa-mir-548e | 0.08984464 | 7.90E-01 | Up |
| hsa-miR-505-5p | 0.0707654 | 7.72E-01 | Up |
| hsa-miR-6781-3p | 0.06061994 | 7.69E-01 | Up |
| hsa-mir-3943 | 0.08696438 | 7.65E-01 | Up |
| hsa-mir-596 | 0.03047825 | 7.63E-01 | Up |
| hsa-miR-6506-5p | 0.07335769 | 7.60E-01 | Up |
| hsa-miR-4455 | 0.03878538 | 7.56E-01 | Up |
| hsa-mir-5190 | 0.08336326 | 7.55E-01 | Up |
| hsa-mir-662 | 0.08735515 | 7.53E-01 | Up |
| hsa-miR-591 | 0.09240228 | 7.51E-01 | Up |
| hsa-miR-4792 | 0.09569426 | 7.49E-01 | Up |
| hsa-mir-6822 | 0.01589953 | 7.48E-01 | Up |
| hsa-mir-6810 | 0.10339405 | 7.45E-01 | Up |
| hsa-mir-3185 | 0.03243692 | 7.44E-01 | Up |
| hsa-miR-1304-5p | 0.04591517 | 7.43E-01 | Up |
| hsa-miR-6765-3p | 0.04341283 | 7.42E-01 | Up |
| hsa-miR-6894-3p | 0.04732181 | 7.42E-01 | Up |
| hsa-miR-1249 | 0.03371533 | 7.40E-01 | Up |
| hsa-miR-139-5p | 0.12897195 | 7.37E-01 | Up |
| hsa-mir-3129 | 0.05655928 | 7.34E-01 | Up |
| hsa-mir-939 | 0.0035432 | 7.30E-01 | Up |
| hsa-mir-1275 | 0.00797304 | 7.29E-01 | Up |
| hsa-mir-8056 | 0.03916144 | 7.28E-01 | Up |
| hsa-miR-329-5p | 0.02530078 | 7.24E-01 | Up |
| hsa-miR-6728-3p | 0.02462168 | 7.21E-01 | Up |
| hsa-miR-1245b-5p | 0.01002485 | 7.20E-01 | Up |
| hsa-miR-3936 | 0.01505165 | 7.17E-01 | Up |
| hsa-miR-4540 | 0.03973212 | 7.15E-01 | Up |
| hsa-miR-661 | 0.03237981 | 7.13E-01 | Up |
| hsa-mir-4756 | 0.01718157 | 7.11E-01 | Up |
| hsa-miR-3667-5p | 0.07683191 | 7.10E-01 | Up |
| hsa-miR-338-5p | 0.09448552 | 7.10E-01 | Up |
| hsa-mir-325 | 0.03036394 | 7.05E-01 | Up |
| hsa-miR-4691-3p | 0.01507298 | 7.01E-01 | Up |
| hsa-miR-4503 | 0.03423174 | 6.96E-01 | Up |
| hsa-mir-1276 | 0.05038497 | 6.95E-01 | Up |
| hsa-miR-4746-5p | 0.06618509 | 6.95E-01 | Up |
| hsa-mir-3199-1 | 0.14330032 | 6.94E-01 | Up |
| hsa-miR-548d-5p | 0.15231898 | 6.94E-01 | Up |
| hsa-miR-885-5p | 0.10374654 | 6.91E-01 | Up |
| hsa-mir-4767 | 0.11428851 | 6.82E-01 | Up |
| hsa-mir-4253 | 0.069143 | 6.81E-01 | Up |
| hsa-miR-1250-3p | 0.14478896 | 6.78E-01 | Up |
| hsa-miR-4447 | 0.05892447 | 6.77E-01 | Up |
| hsa-miR-6783-5p | 0.09005865 | 6.73E-01 | Up |
| hsa-mir-4754 | 0.11688974 | 6.69E-01 | Up |
| hsa-mir-4771-1 | 0.03305436 | 6.66E-01 | Up |
| hsa-mir-4771-2 | 0.03305436 | 6.66E-01 | Up |
| hsa-miR-3192-3p | 0.00683583 | 6.65E-01 | Up |
| hsa-miR-4683 | 0.13270878 | 6.61E-01 | Up |
| hsa-miR-676-3p | 0.10834489 | 6.56E-01 | Up |
| hsa-miR-559 | 0.06735001 | 6.53E-01 | Up |
| hsa-mir-548av | 0.02981385 | 6.52E-01 | Up |
| hsa-miR-4697-3p | 0.08108434 | 6.47E-01 | Up |
| hsa-mir-3617 | 0.07289723 | 6.44E-01 | Up |
| hsa-mir-4312 | 0.06505141 | 6.42E-01 | Up |
| hsa-miR-6864-5p | 0.05176598 | 6.41E-01 | Up |
| hsa-mir-4320 | 0.09210683 | 6.41E-01 | Up |
| hsa-miR-6795-3p | 0.154807 | 6.41E-01 | Up |
| hsa-miR-4725-3p | 0.11548664 | 6.40E-01 | Up |
| hsa-miR-1253 | 0.10276217 | 6.39E-01 | Up |
| hsa-mir-6864 | 0.05909736 | 6.38E-01 | Up |
| hsa-miR-3692-5p | 0.12759551 | 6.36E-01 | Up |
| hsa-miR-4474-3p | 0.12725401 | 6.33E-01 | Up |
| hsa-mir-608 | 0.14335531 | 6.33E-01 | Up |
| hsa-miR-3689a-5p | 0.05656512 | 6.29E-01 | Up |
| hsa-miR-3689b-5p | 0.05656512 | 6.29E-01 | Up |
| hsa-miR-3689e | 0.05656512 | 6.29E-01 | Up |
| hsa-miR-1293 | 0.06756335 | 6.29E-01 | Up |
| hsa-miR-4293 | 0.10583246 | 6.27E-01 | Up |
| hsa-miR-3660 | 0.04706816 | 6.26E-01 | Up |
| hsa-miR-4512 | 0.02892337 | 6.25E-01 | Up |
| hsa-mir-4784 | 0.0302662 | 6.24E-01 | Up |
| hsa-miR-4766-3p | 0.09398592 | 6.24E-01 | Up |
| hsa-miR-4662a-3p | 0.05305009 | 6.23E-01 | Up |
| hsa-mir-7159 | 0.11884147 | 6.19E-01 | Up |
| hsa-mir-652 | 0.0672278 | 6.18E-01 | Up |
| hsa-miR-548h-5p | 0.14471636 | 6.16E-01 | Up |
| hsa-miR-548j-5p | 0.02508679 | 6.13E-01 | Up |
| hsa-mir-4790 | 0.03623582 | 6.12E-01 | Up |
| hsa-miR-6779-3p | 0.05405612 | 6.12E-01 | Up |
| hsa-miR-365b-5p | 0.10315869 | 6.11E-01 | Up |
| hsa-mir-3188 | 0.14795177 | 6.11E-01 | Up |
| hsa-miR-7849-3p | 0.13563816 | 6.10E-01 | Up |
| hsa-miR-3529-3p | 0.05814052 | 6.08E-01 | Up |
| hsa-mir-3926-1 | 0.0864157 | 6.08E-01 | Up |
| hsa-mir-6813 | 0.05038005 | 6.07E-01 | Up |
| hsa-miR-6504-5p | 0.15426468 | 6.06E-01 | Up |
| hsa-mir-8071-1 | 0.01226101 | 6.00E-01 | Up |
| hsa-mir-8071-2 | 0.01226101 | 6.00E-01 | Up |
| hsa-miR-4687-5p | 0.10943471 | 5.98E-01 | Up |
| hsa-miR-6868-3p | 0.06136333 | 5.97E-01 | Up |
| hsa-miR-6757-3p | 0.07835403 | 5.96E-01 | Up |
| hsa-miR-766-5p | 0.08532333 | 5.95E-01 | Up |
| hsa-mir-4665 | 0.04204721 | 5.92E-01 | Up |
| hsa-miR-5004-3p | 0.07675724 | 5.92E-01 | Up |
| hsa-miR-935 | 0.00814607 | 5.90E-01 | Up |
| hsa-miR-3193 | 0.11285737 | 5.88E-01 | Up |
| hsa-mir-888 | 0.11401431 | 5.87E-01 | Up |
| hsa-mir-1245b | 0.03828818 | 5.86E-01 | Up |
| hsa-miR-3670 | 0.08108362 | 5.81E-01 | Up |
| hsa-miR-6853-5p | 0.10275317 | 5.77E-01 | Up |
| hsa-miR-4682 | 0.12105712 | 5.77E-01 | Up |
| hsa-mir-548o-2 | 0.04118005 | 5.75E-01 | Up |
| hsa-miR-216b-3p | 0.06440813 | 5.70E-01 | Up |
| hsa-miR-4764-3p | 0.07111162 | 5.70E-01 | Up |
| hsa-miR-6831-3p | 0.08970325 | 5.70E-01 | Up |
| hsa-mir-6748 | 0.03277736 | 5.69E-01 | Up |
| hsa-miR-7160-5p | 0.07689083 | 5.68E-01 | Up |
| hsa-mir-548t | 0.09460106 | 5.67E-01 | Up |
| hsa-mir-548t | 0.09460106 | 5.67E-01 | Up |
| hsa-mir-661 | 0.04709825 | 5.66E-01 | Up |
| hsa-miR-548p | 0.05850908 | 5.66E-01 | Up |
| hsa-mir-5684 | 0.12740233 | 5.64E-01 | Up |
| hsa-miR-6513-3p | 0.12264428 | 5.63E-01 | Up |
| hsa-miR-3918 | 0.08482166 | 5.59E-01 | Up |
| hsa-miR-5690 | 0.03296071 | 5.57E-01 | Up |
| hsa-miR-502-5p | 0.09598199 | 5.56E-01 | Up |
| hsa-miR-4491 | 0.09852871 | 5.53E-01 | Up |
| hsa-miR-6762-3p | 0.11652553 | 5.52E-01 | Up |
| hsa-miR-3677-3p | 0.13178788 | 5.51E-01 | Up |
| hsa-mir-3648 | 0.08355325 | 5.48E-01 | Up |
| hsa-mir-212 | 0.09902508 | 5.46E-01 | Up |
| hsa-miR-4657 | 0.14096511 | 5.46E-01 | Up |
| hsa-miR-6891-3p | 0.06707857 | 5.45E-01 | Up |
| hsa-mir-3170 | 0.09040576 | 5.44E-01 | Up |
| hsa-mir-6809 | 0.09516572 | 5.44E-01 | Up |
| hsa-miR-3934-5p | 0.03211593 | 5.43E-01 | Up |
| hsa-miR-3687 | 0.06821788 | 5.41E-01 | Up |
| hsa-miR-1284 | 0.07512824 | 5.40E-01 | Up |
| hsa-mir-4764 | 0.08358958 | 5.39E-01 | Up |
| hsa-miR-1277-3p | 0.04695077 | 5.37E-01 | Up |
| hsa-miR-4469 | 0.05427035 | 5.36E-01 | Up |
| hsa-miR-3616-5p | 0.06173271 | 5.36E-01 | Up |
| hsa-mir-634 | 0.06025955 | 5.35E-01 | Up |
| hsa-miR-5008-5p | 0.12588913 | 5.35E-01 | Up |
| hsa-miR-148a-5p | 0.12760194 | 5.35E-01 | Up |
| hsa-mir-499a | 0.10775067 | 5.34E-01 | Up |
| hsa-miR-1297 | 0.05303466 | 5.32E-01 | Up |
| hsa-mir-421 | 0.0284474 | 5.31E-01 | Up |
| hsa-miR-5188 | 0.08541687 | 5.31E-01 | Up |
| hsa-mir-663a | 0.11319306 | 5.30E-01 | Up |
| hsa-mir-193a | 0.08333782 | 5.29E-01 | Up |
| hsa-mir-6850 | 0.0887224 | 5.23E-01 | Up |
| hsa-miR-4424 | 0.11397505 | 5.21E-01 | Up |
| hsa-mir-4695 | 0.06636385 | 5.20E-01 | Up |
| hsa-miR-3126-3p | 0.06521226 | 5.19E-01 | Up |
| hsa-miR-3591-5p | 0.06725408 | 5.17E-01 | Up |
| hsa-miR-4725-5p | 0.05841718 | 5.16E-01 | Up |
| hsa-miR-581 | 0.04284413 | 5.12E-01 | Up |
| hsa-miR-4506 | 0.08963092 | 5.11E-01 | Up |
| hsa-mir-299 | 0.06239517 | 5.09E-01 | Up |
| hsa-mir-5580 | 0.08282291 | 5.08E-01 | Up |
| hsa-mir-9-1 | 0.01447879 | 5.07E-01 | Up |
| hsa-miR-6874-3p | 0.09933263 | 5.06E-01 | Up |
| hsa-miR-7976 | 0.11991127 | 5.05E-01 | Up |
| hsa-miR-363-5p | 0.09837798 | 5.04E-01 | Up |
| hsa-miR-452-5p | 0.04532121 | 5.02E-01 | Up |
| hsa-mir-3660 | 0.13622323 | 4.99E-01 | Up |
| hsa-mir-5694 | 0.04491854 | 4.98E-01 | Up |
| hsa-mir-891a | 0.08306754 | 4.98E-01 | Up |
| hsa-miR-4713-3p | 0.07956399 | 4.96E-01 | Up |
| hsa-mir-4498 | 0.141623 | 4.95E-01 | Up |
| hsa-miR-3179 | 0.0561728 | 4.92E-01 | Up |
| hsa-mir-222 | 0.14025322 | 4.92E-01 | Up |
| hsa-mir-6780b | 0.14890435 | 4.90E-01 | Up |
| hsa-miR-6768-3p | 0.05795739 | 4.88E-01 | Up |
| hsa-miR-4295 | 0.07657031 | 4.87E-01 | Up |
| hsa-miR-647 | 0.10565057 | 4.87E-01 | Up |
| hsa-miR-548y | 0.13109271 | 4.87E-01 | Up |
| hsa-miR-6815-3p | 0.05346957 | 4.86E-01 | Up |
| hsa-mir-6505 | 0.09827827 | 4.86E-01 | Up |
| hsa-mir-4509-1 | 0.13932528 | 4.86E-01 | Up |
| hsa-mir-4509-2 | 0.13932528 | 4.86E-01 | Up |
| hsa-mir-4509-3 | 0.13932528 | 4.86E-01 | Up |
| hsa-mir-4428 | 0.06730941 | 4.84E-01 | Up |
| hsa-mir-574 | 0.02677551 | 4.83E-01 | Up |
| hsa-miR-376b-5p | 0.06555662 | 4.83E-01 | Up |
| hsa-mir-4742 | 0.0805032 | 4.83E-01 | Up |
| hsa-mir-3158-1 | 0.15098581 | 4.83E-01 | Up |
| hsa-mir-5692c-2 | 0.09091828 | 4.80E-01 | Up |
| hsa-mir-3960 | 0.08796346 | 4.79E-01 | Up |
| hsa-miR-20b-3p | 0.13466505 | 4.79E-01 | Up |
| hsa-mir-548av | 0.05075708 | 4.78E-01 | Up |
| hsa-mir-4523 | 0.11336826 | 4.75E-01 | Up |
| hsa-mir-7973-2 | 0.08693698 | 4.74E-01 | Up |
| hsa-mir-365a | 0.07809814 | 4.73E-01 | Up |
| hsa-mir-30e | 0.05757178 | 4.72E-01 | Up |
| hsa-mir-6088 | 0.10316794 | 4.71E-01 | Up |
| hsa-miR-659-5p | 0.06512019 | 4.69E-01 | Up |
| hsa-miR-5692b | 0.1453773 | 4.69E-01 | Up |
| hsa-mir-5008 | 0.09391794 | 4.67E-01 | Up |
| hsa-mir-3127 | 0.04532867 | 4.66E-01 | Up |
| hsa-miR-3173-5p | 0.10474121 | 4.65E-01 | Up |
| hsa-miR-6813-3p | 0.10567327 | 4.64E-01 | Up |
| hsa-mir-103a-1 | 0.14961021 | 4.64E-01 | Up |
| hsa-mir-552 | 0.09174663 | 4.63E-01 | Up |
| hsa-mir-4302 | 0.0926635 | 4.61E-01 | Up |
| hsa-miR-6866-5p | 0.10351456 | 4.58E-01 | Up |
| hsa-miR-6841-5p | 0.10561985 | 4.57E-01 | Up |
| hsa-mir-548ao | 0.0806312 | 4.55E-01 | Up |
| hsa-mir-3158-1 | 0.09768339 | 4.55E-01 | Up |
| hsa-miR-4772-5p | 0.13845107 | 4.55E-01 | Up |
| hsa-mir-3910-2 | 0.12328504 | 4.51E-01 | Up |
| hsa-miR-4529-5p | 0.1308027 | 4.49E-01 | Up |
| hsa-miR-5007-5p | 0.05635439 | 4.48E-01 | Up |
| hsa-mir-558 | 0.13247662 | 4.48E-01 | Up |
| hsa-mir-6830 | 0.08522818 | 4.46E-01 | Up |
| hsa-miR-922 | 0.12943673 | 4.43E-01 | Up |
| hsa-miR-5094 | 0.06750483 | 4.42E-01 | Up |
| hsa-miR-6734-3p | 0.04793027 | 4.39E-01 | Up |
| hsa-mir-148a | 0.10921395 | 4.38E-01 | Up |
| hsa-miR-888-3p | 0.03366959 | 4.37E-01 | Up |
| hsa-miR-612 | 0.0767306 | 4.37E-01 | Up |
| hsa-mir-3944 | 0.12986261 | 4.35E-01 | Up |
| hsa-miR-4720-3p | 0.1157604 | 4.34E-01 | Up |
| hsa-mir-5186 | 0.04789516 | 4.32E-01 | Up |
| hsa-miR-1271-3p | 0.06578812 | 4.32E-01 | Up |
| hsa-miR-6073 | 0.07583983 | 4.32E-01 | Up |
| hsa-mir-646 | 0.08591289 | 4.27E-01 | Up |
| hsa-miR-6755-3p | 0.0644084 | 4.26E-01 | Up |
| hsa-miR-3976 | 0.07386689 | 4.25E-01 | Up |
| hsa-miR-598-3p | 0.10005124 | 4.25E-01 | Up |
| hsa-miR-6733-5p | 0.14131613 | 4.25E-01 | Up |
| hsa-miR-5583-5p | 0.05729772 | 4.22E-01 | Up |
| hsa-mir-6084 | 0.13588478 | 4.21E-01 | Up |
| hsa-mir-4256 | 0.05694724 | 4.18E-01 | Up |
| hsa-miR-3678-3p | 0.15457223 | 4.17E-01 | Up |
| hsa-mir-6086 | 0.12080666 | 4.15E-01 | Up |
| hsa-mir-6746 | 0.10433451 | 4.10E-01 | Up |
| hsa-mir-6775 | 0.10935003 | 4.09E-01 | Up |
| hsa-miR-6774-3p | 0.02705422 | 4.08E-01 | Up |
| hsa-miR-6731-5p | 0.08316532 | 4.08E-01 | Up |
| hsa-mir-1245a | 0.14376292 | 4.07E-01 | Up |
| hsa-miR-4700-3p | 0.05754629 | 4.06E-01 | Up |
| hsa-miR-16-1-3p | 0.13299641 | 4.06E-01 | Up |
| hsa-miR-6752-3p | 0.15035452 | 3.99E-01 | Up |
| hsa-miR-4522 | 0.1315944 | 3.96E-01 | Up |
| hsa-miR-613 | 0.13346446 | 3.96E-01 | Up |
| hsa-mir-3606 | 0.09978675 | 3.95E-01 | Up |
| hsa-miR-4643 | 0.11260827 | 3.95E-01 | Up |
| hsa-mir-3670-1 | 0.1062657 | 3.92E-01 | Up |
| hsa-mir-3670-2 | 0.1062657 | 3.92E-01 | Up |
| hsa-mir-6815 | 0.09677228 | 3.89E-01 | Up |
| hsa-miR-3924 | 0.1077692 | 3.87E-01 | Up |
| hsa-miR-6515-3p | 0.14414865 | 3.87E-01 | Up |
| hsa-miR-4652-3p | 0.14690365 | 3.82E-01 | Up |
| hsa-mir-153-1 | 0.10210438 | 3.81E-01 | Up |
| hsa-miR-4315 | 0.1082237 | 3.81E-01 | Up |
| hsa-miR-29b-3p | 0.07811589 | 3.79E-01 | Up |
| hsa-mir-449b | 0.12399988 | 3.79E-01 | Up |
| hsa-mir-125b-2 | 0.12915719 | 3.79E-01 | Up |
| hsa-let-7d | 0.1133816 | 3.70E-01 | Up |
| hsa-miR-3190-3p | 0.08589123 | 3.68E-01 | Up |
| hsa-mir-4755 | 0.10115049 | 3.62E-01 | Up |
| hsa-miR-6723-5p | 0.07229835 | 3.54E-01 | Up |
| hsa-miR-4727-5p | 0.1239659 | 3.53E-01 | Up |
| hsa-miR-222-5p | 0.13303051 | 3.52E-01 | Up |
| hsa-mir-1178 | 0.10228694 | 3.49E-01 | Up |
| hsa-mir-3118-4 | 0.11381688 | 3.49E-01 | Up |
| hsa-mir-3118-6 | 0.11381688 | 3.49E-01 | Up |
| hsa-mir-4328 | 0.10720418 | 3.48E-01 | Up |
| hsa-miR-548ag | 0.09284971 | 3.42E-01 | Up |
| hsa-mir-371b | 0.14727147 | 3.39E-01 | Up |
| hsa-miR-570-5p | 0.09508167 | 3.38E-01 | Up |
| hsa-miR-548ai | 0.09508167 | 3.38E-01 | Up |
| hsa-mir-4666b | 0.09478482 | 3.25E-01 | Up |
| hsa-miR-192-5p | 0.14645457 | 3.19E-01 | Up |
| hsa-mir-6841 | 0.11356997 | 3.13E-01 | Up |
| hsa-mir-4704 | 0.136488 | 3.10E-01 | Up |
| hsa-miR-371b-5p | 0.10405598 | 2.85E-01 | Up |
| hsa-miR-4661-3p | 0.13609981 | 2.85E-01 | Up |
| hsa-miR-6887-3p | 0.14213873 | 2.75E-01 | Up |
| hsa-mir-8060 | 0.11416003 | 2.74E-01 | Up |
| hsa-mir-190a | 0.15340875 | 2.35E-01 | Up |
| hsa-miR-515-5p | 0.00000194 | -3.11 | Down |
| hsa-miR-518e-3p | 0.00000335 | -4.05 | Down |
| hsa-miR-520d-5p | 0.00000366 | -2.92 | Down |
| hsa-miR-512-5p | 0.00000719 | -2.55 | Down |
| hsa-miR-517c-3p | 0.00000784 | -4.04 | Down |
| hsa-miR-525-3p | 0.00000791 | -2.93 | Down |
| hsa-miR-518b | 0.00001749 | -3.2 | Down |
| hsa-miR-1283 | 0.00001751 | -2.85 | Down |
| hsa-miR-520c-3p | 0.0000209 | -2.83 | Down |
| hsa-miR-515-3p | 0.00002268 | -2.78 | Down |
| hsa-miR-519d-5p | 0.00002686 | -3.09 | Down |
| hsa-miR-518a-5p | 0.00002735 | -3.6 | Down |
| hsa-miR-527 | 0.00002735 | -3.6 | Down |
| hsa-mir-520a | 0.00003075 | -1.88 | Down |
| hsa-miR-518a-3p | 0.00003123 | -3.64 | Down |
| hsa-miR-138-5p | 0.00003551 | -2.97 | Down |
| hsa-mir-527 | 0.00006521 | -2.1 | Down |
| hsa-miR-520h | 0.00006792 | -3.33 | Down |
| hsa-miR-520f-5p | 0.00006851 | -2.82 | Down |
| hsa-miR-519e-5p | 0.00007894 | -3.66 | Down |
| hsa-miR-519a-3p | 0.00013372 | -3.01 | Down |
| hsa-mir-519a-2 | 0.00019889 | -1.57 | Down |
| hsa-miR-518f-3p | 0.00033951 | -2.73 | Down |
| hsa-miR-520d-3p | 0.00038538 | -2.65 | Down |
| hsa-miR-523-3p | 0.00041548 | -2.53 | Down |
| hsa-mir-525 | 0.00061755 | -1.71 | Down |
| hsa-miR-524-5p | 0.00062306 | -3.43 | Down |
| hsa-mir-525 | 0.00071871 | -1.76 | Down |
| hsa-miR-518c-5p | 0.0009629 | -2.76 | Down |
| hsa-mir-523 | 0.00098366 | -2.4 | Down |
| hsa-mir-516b-1 | 0.00099018 | -2.85 | Down |
| hsa-miR-519b-3p | 0.0011129 | -2.34 | Down |
| hsa-miR-519d-3p | 0.00123361 | -3.2 | Down |
| hsa-mir-1283-2 | 0.00129911 | -2.07 | Down |
| hsa-miR-522-3p | 0.00172625 | -3.13 | Down |
| hsa-mir-518a-2 | 0.00174026 | -2.1 | Down |
| hsa-mir-520b | 0.00209965 | -1.46 | Down |
| hsa-mir-512-1 | 0.00234843 | -1.58 | Down |
| hsa-mir-512-2 | 0.00234843 | -1.58 | Down |
| hsa-miR-3139 | 0.00268271 | -1.39 | Down |
| hsa-mir-523 | 0.00274374 | -1.35 | Down |
| hsa-miR-519c-5p | 0.00297976 | -3.06 | Down |
| hsa-miR-519b-5p | 0.00297976 | -3.06 | Down |
| hsa-miR-523-5p | 0.00297976 | -3.06 | Down |
| hsa-miR-518e-5p | 0.00297976 | -3.06 | Down |
| hsa-miR-522-5p | 0.00297976 | -3.06 | Down |
| hsa-miR-519a-5p | 0.00297976 | -3.06 | Down |
| hsa-miR-520a-5p | 0.00327469 | -3.27 | Down |
| hsa-mir-518b | 0.00349301 | -2.07 | Down |
| hsa-miR-518c-3p | 0.0037439 | -2.26 | Down |
| hsa-mir-520c | 0.00390793 | -1.86 | Down |
| hsa-miR-525-5p | 0.00392856 | -2.39 | Down |
| hsa-mir-518a-1 | 0.00399804 | -2.24 | Down |
| hsa-miR-520g-3p | 0.00405112 | -3.02 | Down |
| hsa-mir-516b-2 | 0.0042079 | -1.41 | Down |
| hsa-mir-522 | 0.00519166 | -1.36 | Down |
| hsa-mir-520d | 0.00528862 | -1.02 | Down |
| hsa-miR-498 | 0.00537496 | -7.77E-01 | Down |
| hsa-miR-6785-3p | 0.00573237 | -9.26E-01 | Down |
| hsa-mir-519b | 0.00595535 | -2.27 | Down |
| hsa-mir-519a-1 | 0.00644884 | -1.35 | Down |
| hsa-mir-4465 | 0.00682556 | -7.14E-01 | Down |
| hsa-mir-519d | 0.00727175 | -1.83 | Down |
| hsa-miR-512-3p | 0.00742274 | -2.52 | Down |
| hsa-miR-4436b-3p | 0.00777726 | -1.05 | Down |
| hsa-mir-4501 | 0.00807778 | -7.34E-01 | Down |
| hsa-mir-128-1 | 0.00864792 | -1.01 | Down |
| hsa-mir-518e | 0.00869199 | -1.32 | Down |
| hsa-miR-517-5p | 0.00875569 | -1.74 | Down |
| hsa-mir-517a | 0.0094011 | -9.89E-01 | Down |
| hsa-miR-519c-3p | 0.00956899 | -1.58 | Down |
| hsa-miR-1229-3p | 0.00966608 | -8.94E-01 | Down |
| hsa-miR-526b-5p | 0.00978311 | -3.17 | Down |
| hsa-miR-520a-3p | 0.01010817 | -1.59 | Down |
| hsa-miR-518f-5p | 0.01037331 | -2.78 | Down |
| hsa-mir-1323 | 0.01040698 | -1.28 | Down |
| hsa-mir-521-1 | 0.01090852 | -6.33E-01 | Down |
| hsa-miR-526a | 0.01125074 | -2.59 | Down |
| hsa-miR-520c-5p | 0.01125074 | -2.59 | Down |
| hsa-miR-518d-5p | 0.01125074 | -2.59 | Down |
| hsa-mir-8066 | 0.01221537 | -7.73E-01 | Down |
| hsa-miR-770-5p | 0.01285712 | -8.78E-01 | Down |
| hsa-mir-518f | 0.01290209 | -1.08 | Down |
| hsa-let-7e-3p | 0.01304607 | -1.13 | Down |
| hsa-miR-3194-5p | 0.01316533 | -8.80E-01 | Down |
| hsa-mir-526b | 0.01318165 | -1.43 | Down |
| hsa-mir-519c | 0.01383122 | -1.41 | Down |
| hsa-miR-516a-5p | 0.01442079 | -2.54 | Down |
| hsa-miR-516b-5p | 0.01506735 | -2.09 | Down |
| hsa-miR-600 | 0.01518934 | -5.56E-01 | Down |
| hsa-miR-524-3p | 0.01653384 | -1.9 | Down |
| hsa-miR-2681-5p | 0.01654656 | -1.63 | Down |
| hsa-mir-516a-1 | 0.01681858 | -2.36 | Down |
| hsa-mir-516a-2 | 0.01681858 | -2.36 | Down |
| hsa-miR-130b-5p | 0.01692983 | -1.44 | Down |
| hsa-miR-517a-3p | 0.01725957 | -2.16 | Down |
| hsa-miR-517b-3p | 0.01725957 | -2.16 | Down |
| hsa-miR-514b-5p | 0.01735459 | -7.21E-01 | Down |
| hsa-mir-6767 | 0.01785849 | -1.12 | Down |
| hsa-mir-6514 | 0.01889955 | -5.39E-01 | Down |
| hsa-miR-521 | 0.01970865 | -2.38 | Down |
| hsa-miR-518d-3p | 0.02039745 | -5.59E-01 | Down |
| hsa-mir-676 | 0.02041524 | -5.67E-01 | Down |
| hsa-miR-380-5p | 0.02044742 | -6.65E-01 | Down |
| hsa-miR-6516-3p | 0.02077807 | -4.89E-01 | Down |
| hsa-mir-4418 | 0.02105151 | -6.58E-01 | Down |
| hsa-miR-6740-3p | 0.02176351 | -1.02 | Down |
| hsa-miR-6767-5p | 0.02202595 | -1.83 | Down |
| hsa-miR-188-5p | 0.02405583 | -5.29E-01 | Down |
| hsa-mir-323b | 0.02418382 | -6.40E-01 | Down |
| hsa-miR-4289 | 0.02453908 | -1.07 | Down |
| hsa-mir-526a-2 | 0.02517512 | -5.71E-01 | Down |
| hsa-mir-323b | 0.02567503 | -5.41E-01 | Down |
| hsa-miR-30d-3p | 0.0258202 | -5.36E-01 | Down |
| hsa-miR-1200 | 0.02591002 | -7.82E-01 | Down |
| hsa-miR-4476 | 0.02605368 | -5.68E-01 | Down |
| hsa-mir-7106 | 0.02755638 | -5.70E-01 | Down |
| hsa-miR-142-5p | 0.02789714 | -9.63E-01 | Down |
| hsa-mir-4709 | 0.02818259 | -7.32E-01 | Down |
| hsa-miR-3140-3p | 0.03008331 | -1.28 | Down |
| hsa-mir-542 | 0.03049102 | -6.18E-01 | Down |
| hsa-mir-4298 | 0.03094574 | -7.40E-01 | Down |
| hsa-mir-503 | 0.03202783 | -7.67E-01 | Down |
| hsa-mir-524 | 0.03222931 | -9.55E-01 | Down |
| hsa-miR-8054 | 0.0324047 | -7.03E-01 | Down |
| hsa-mir-3074 | 0.03250872 | -7.34E-01 | Down |
| hsa-miR-629-3p | 0.03262653 | -6.34E-01 | Down |
| hsa-miR-6730-5p | 0.03272457 | -8.31E-01 | Down |
| hsa-mir-3160-2 | 0.03305101 | -6.20E-01 | Down |
| hsa-mir-5589 | 0.03305815 | -4.38E-01 | Down |
| hsa-miR-921 | 0.03364722 | -1.01 | Down |
| hsa-miR-7159-5p | 0.03460945 | -5.77E-01 | Down |
| hsa-miR-4770 | 0.0346967 | -6.91E-01 | Down |
| hsa-miR-519e-3p | 0.03587708 | -1.19 | Down |
| hsa-miR-4288 | 0.0360564 | -6.95E-01 | Down |
| hsa-miR-601 | 0.03627752 | -8.46E-01 | Down |
| hsa-miR-548c-3p | 0.03688538 | -7.42E-01 | Down |
| hsa-mir-4744 | 0.03714648 | -7.95E-01 | Down |
| hsa-mir-548u | 0.03728956 | -5.32E-01 | Down |
| hsa-miR-6816-3p | 0.03826769 | -3.76E-01 | Down |
| hsa-miR-3164 | 0.0391588 | -6.39E-01 | Down |
| hsa-mir-378d-2 | 0.03965577 | -7.17E-01 | Down |
| hsa-miR-541-3p | 0.0413249 | -1.06 | Down |
| hsa-mir-4305 | 0.0414451 | -7.13E-01 | Down |
| hsa-mir-129-1 | 0.04146396 | -6.93E-01 | Down |
| hsa-miR-558 | 0.04257881 | -9.55E-01 | Down |
| hsa-miR-302f | 0.04260644 | -5.95E-01 | Down |
| hsa-miR-34a-5p | 0.04324827 | -5.10E-01 | Down |
| hsa-miR-675-3p | 0.04365127 | -6.67E-01 | Down |
| hsa-miR-1323 | 0.04368225 | -4.79E-01 | Down |
| hsa-miR-377-3p | 0.04384011 | -1.1 | Down |
| hsa-miR-526b-3p | 0.04398584 | -9.76E-01 | Down |
| hsa-miR-3689a-3p | 0.04408248 | -6.84E-01 | Down |
| hsa-mir-2116 | 0.04443684 | -5.69E-01 | Down |
| hsa-mir-302b | 0.04444381 | -5.51E-01 | Down |
| hsa-miR-5683 | 0.0447458 | -6.62E-01 | Down |
| hsa-miR-96-5p | 0.04590076 | -5.67E-01 | Down |
| hsa-miR-212-5p | 0.04600118 | -5.57E-01 | Down |
| hsa-mir-141 | 0.04685881 | -7.42E-01 | Down |
| hsa-mir-582 | 0.04721817 | -4.18E-01 | Down |
| hsa-miR-551a | 0.04727316 | -9.80E-01 | Down |
| hsa-miR-6516-5p | 0.04795847 | -5.95E-01 | Down |
| hsa-miR-6743-3p | 0.047972 | -7.23E-01 | Down |
| hsa-miR-3177-5p | 0.04823195 | -6.79E-01 | Down |
| hsa-mir-128-2 | 0.04868812 | -5.79E-01 | Down |
| hsa-miR-4715-5p | 0.04918057 | -4.96E-01 | Down |
| hsa-mir-3936 | 0.04960455 | -5.17E-01 | Down |
| hsa-miR-26a-2-3p | 0.05042765 | -5.96E-01 | Down |
| hsa-miR-4504 | 0.05146032 | -4.98E-01 | Down |
| hsa-mir-185 | 0.05259128 | -8.05E-01 | Down |
| hsa-miR-6814-5p | 0.05294727 | -8.16E-01 | Down |
| hsa-miR-544a | 0.05297116 | -4.98E-01 | Down |
| hsa-miR-27b-5p | 0.05305913 | -7.80E-01 | Down |
| hsa-miR-520f-3p | 0.05430638 | -1.9 | Down |
| hsa-miR-4804-3p | 0.05463193 | -9.61E-01 | Down |
| hsa-mir-23a | 0.05471713 | -3.84E-01 | Down |
| hsa-miR-4419a | 0.05477092 | -4.98E-01 | Down |
| hsa-mir-2115 | 0.05482769 | -5.15E-01 | Down |
| hsa-mir-424 | 0.05542276 | -7.35E-01 | Down |
| hsa-mir-4679-1 | 0.0556018 | -4.35E-01 | Down |
| hsa-miR-4679 | 0.05617031 | -7.20E-01 | Down |
| hsa-mir-126 | 0.0564044 | -4.11E-01 | Down |
| hsa-mir-6727 | 0.05767586 | -5.88E-01 | Down |
| hsa-mir-8053 | 0.05787029 | -5.32E-01 | Down |
| hsa-miR-1273h-5p | 0.05803573 | -4.75E-01 | Down |
| hsa-miR-3908 | 0.05803826 | -5.73E-01 | Down |
| hsa-miR-4474-5p | 0.05822747 | -4.74E-01 | Down |
| hsa-miR-548av-5p | 0.05832552 | -7.49E-01 | Down |
| hsa-mir-6859-1 | 0.05839558 | -4.19E-01 | Down |
| hsa-mir-6859-2 | 0.05839558 | -4.19E-01 | Down |
| hsa-mir-6859-3 | 0.05839558 | -4.19E-01 | Down |
| hsa-mir-449a | 0.05856472 | -8.38E-01 | Down |
| hsa-mir-2113 | 0.05881335 | -5.17E-01 | Down |
| hsa-mir-5591 | 0.05883622 | -5.42E-01 | Down |
| hsa-miR-548ah-5p | 0.05907342 | -7.84E-01 | Down |
| hsa-miR-3607-3p | 0.05951863 | -9.59E-01 | Down |
| hsa-miR-6850-3p | 0.05980273 | -7.32E-01 | Down |
| hsa-mir-134 | 0.05995236 | -7.88E-01 | Down |
| hsa-mir-302f | 0.06015846 | -5.84E-01 | Down |
| hsa-mir-4282 | 0.06024269 | -3.68E-01 | Down |
| hsa-miR-4460 | 0.06029391 | -7.00E-01 | Down |
| hsa-mir-1205 | 0.06065835 | -5.13E-01 | Down |
| hsa-miR-132-5p | 0.0607749 | -8.83E-01 | Down |
| hsa-let-7a-2-3p | 0.06123186 | -3.70E-01 | Down |
| hsa-mir-1302-8 | 0.06124204 | -6.67E-01 | Down |
| hsa-mir-515-1 | 0.06221432 | -8.75E-01 | Down |
| hsa-mir-515-2 | 0.06221432 | -8.75E-01 | Down |
| hsa-miR-301a-3p | 0.06263671 | -6.76E-01 | Down |
| hsa-miR-765 | 0.06292376 | -7.81E-01 | Down |
| hsa-mir-4492 | 0.06313683 | -3.74E-01 | Down |
| hsa-mir-4419b | 0.06455875 | -4.42E-01 | Down |
| hsa-miR-6769a-5p | 0.06485966 | -4.10E-01 | Down |
| hsa-mir-511 | 0.06524022 | -4.07E-01 | Down |
| hsa-mir-378f | 0.06587998 | -5.59E-01 | Down |
| hsa-mir-6727 | 0.06641931 | -5.56E-01 | Down |
| hsa-miR-6794-3p | 0.06643349 | -6.75E-01 | Down |
| hsa-miR-5009-5p | 0.06714379 | -8.15E-01 | Down |
| hsa-mir-98 | 0.06716642 | -3.60E-01 | Down |
| hsa-miR-3605-5p | 0.06744622 | -7.46E-01 | Down |
| hsa-miR-181a-3p | 0.06793134 | -1.42 | Down |
| hsa-mir-378b | 0.06989267 | -5.30E-01 | Down |
| hsa-miR-488-5p | 0.0699409 | -4.43E-01 | Down |
| hsa-mir-16-2 | 0.07034028 | -3.80E-01 | Down |
| hsa-miR-5001-3p | 0.070424 | -6.31E-01 | Down |
| hsa-miR-555 | 0.07068296 | -3.69E-01 | Down |
| hsa-mir-3607 | 0.0707772 | -6.72E-01 | Down |
| hsa-mir-16-2 | 0.0710338 | -3.97E-01 | Down |
| hsa-mir-4712 | 0.07135582 | -5.49E-01 | Down |
| hsa-miR-664b-3p | 0.07179814 | -5.58E-01 | Down |
| hsa-miR-4493 | 0.07188062 | -8.41E-01 | Down |
| hsa-miR-4311 | 0.07226077 | -5.53E-01 | Down |
| hsa-mir-302b | 0.07248504 | -5.12E-01 | Down |
| hsa-miR-4676-5p | 0.072803 | -3.84E-01 | Down |
| hsa-miR-212-3p | 0.07292067 | -6.78E-01 | Down |
| hsa-mir-3173 | 0.0733536 | -4.54E-01 | Down |
| hsa-miR-192-3p | 0.07380334 | -4.05E-01 | Down |
| hsa-miR-514a-5p | 0.07384351 | -7.05E-01 | Down |
| hsa-miR-384 | 0.07402174 | -5.76E-01 | Down |
| hsa-miR-6868-5p | 0.07455172 | -4.71E-01 | Down |
| hsa-miR-4778-5p | 0.07561535 | -1.43 | Down |
| hsa-miR-454-3p | 0.07575271 | -5.80E-01 | Down |
| hsa-mir-151b | 0.0759725 | -4.12E-01 | Down |
| hsa-mir-30a | 0.07610781 | -6.32E-01 | Down |
| hsa-miR-4736 | 0.07611041 | -4.73E-01 | Down |
| hsa-miR-6837-5p | 0.07636109 | -7.09E-01 | Down |
| hsa-mir-936 | 0.07680573 | -5.60E-01 | Down |
| hsa-miR-3134 | 0.07681686 | -6.64E-01 | Down |
| hsa-mir-7705 | 0.07697227 | -7.63E-01 | Down |
| hsa-miR-4773 | 0.07781825 | -5.03E-01 | Down |
| hsa-miR-4764-5p | 0.07798142 | -3.73E-01 | Down |
| hsa-miR-6076 | 0.07801118 | -4.15E-01 | Down |
| hsa-mir-613 | 0.0783673 | -3.83E-01 | Down |
| hsa-mir-3662 | 0.07886265 | -4.61E-01 | Down |
| hsa-miR-133b | 0.07916214 | -1.14 | Down |
| hsa-mir-1181 | 0.07922041 | -4.41E-01 | Down |
| hsa-mir-4650-1 | 0.07963532 | -6.10E-01 | Down |
| hsa-mir-4650-2 | 0.07963532 | -6.10E-01 | Down |
| hsa-mir-320d-1 | 0.08027816 | -8.22E-01 | Down |
| hsa-mir-501 | 0.08054828 | -3.36E-01 | Down |
| hsa-miR-520e | 0.08082305 | -5.33E-01 | Down |
| hsa-miR-6738-5p | 0.08087434 | -5.97E-01 | Down |
| hsa-mir-30a | 0.0809677 | -6.35E-01 | Down |
| hsa-miR-511-3p | 0.08183756 | -8.18E-01 | Down |
| hsa-mir-5681a | 0.0819757 | -4.97E-01 | Down |
| hsa-mir-1197 | 0.08246526 | -5.10E-01 | Down |
| hsa-mir-6794 | 0.08328009 | -3.89E-01 | Down |
| hsa-mir-8073 | 0.08437845 | -6.74E-01 | Down |
| hsa-miR-3679-3p | 0.08460509 | -5.80E-01 | Down |
| hsa-mir-6749 | 0.0849854 | -4.81E-01 | Down |
| hsa-miR-424-5p | 0.08592108 | -3.31E-01 | Down |
| hsa-mir-3614 | 0.08607626 | -5.78E-01 | Down |
| hsa-miR-7114-3p | 0.08625673 | -6.78E-01 | Down |
| hsa-miR-196a-5p | 0.08628426 | -8.70E-01 | Down |
| hsa-miR-506-3p | 0.086382 | -7.33E-01 | Down |
| hsa-mir-3135b | 0.08675041 | -5.15E-01 | Down |
| hsa-mir-450a-1 | 0.08678359 | -4.10E-01 | Down |
| hsa-miR-4789-3p | 0.0869545 | -6.92E-01 | Down |
| hsa-mir-301b | 0.08724073 | -5.06E-01 | Down |
| hsa-mir-3116-1 | 0.08761214 | -7.25E-01 | Down |
| hsa-mir-3116-2 | 0.08761214 | -7.25E-01 | Down |
| hsa-miR-4675 | 0.08780012 | -7.03E-01 | Down |
| hsa-mir-4746 | 0.08794529 | -5.78E-01 | Down |
| hsa-miR-563 | 0.08825398 | -6.32E-01 | Down |
| hsa-miR-4644 | 0.08839126 | -3.75E-01 | Down |
| hsa-miR-323b-5p | 0.08892624 | -6.27E-01 | Down |
| hsa-mir-4717 | 0.08902988 | -3.42E-01 | Down |
| hsa-mir-101-1 | 0.08904562 | -4.67E-01 | Down |
| hsa-miR-5584-5p | 0.09109868 | -3.68E-01 | Down |
| hsa-mir-4794 | 0.09172955 | -4.61E-01 | Down |
| hsa-miR-6832-3p | 0.09209701 | -7.74E-01 | Down |
| hsa-miR-8056 | 0.0922062 | -4.47E-01 | Down |
| hsa-mir-1257 | 0.09268781 | -4.95E-01 | Down |
| hsa-miR-542-3p | 0.09294694 | -4.59E-01 | Down |
| hsa-miR-140-5p | 0.09305603 | -6.83E-01 | Down |
| hsa-mir-513b | 0.09348009 | -7.03E-01 | Down |
| hsa-mir-6499 | 0.09365223 | -4.85E-01 | Down |
| hsa-miR-4329 | 0.09397765 | -3.93E-01 | Down |
| hsa-miR-1911-5p | 0.09400667 | -6.19E-01 | Down |
| hsa-miR-34a-3p | 0.09431542 | -4.53E-01 | Down |
| hsa-miR-4635 | 0.09431755 | -5.59E-01 | Down |
| hsa-miR-101-5p | 0.09439962 | -5.36E-01 | Down |
| hsa-mir-6744 | 0.094444 | -5.69E-01 | Down |
| hsa-mir-6755 | 0.09451529 | -3.62E-01 | Down |
| hsa-miR-4521 | 0.09476956 | -9.56E-01 | Down |
| hsa-miR-362-3p | 0.09482022 | -6.71E-01 | Down |
| hsa-miR-3175 | 0.09517541 | -9.09E-01 | Down |
| hsa-mir-802 | 0.09519575 | -4.33E-01 | Down |
| hsa-miR-4804-5p | 0.09554145 | -6.43E-01 | Down |
| hsa-mir-495 | 0.09602776 | -8.52E-01 | Down |
| hsa-miR-223-3p | 0.09635826 | -7.96E-01 | Down |
| hsa-miR-1295b-3p | 0.09778648 | -5.37E-01 | Down |
| hsa-mir-450a-1 | 0.09794947 | -4.05E-01 | Down |
| hsa-miR-3657 | 0.09801136 | -4.87E-01 | Down |
| hsa-miR-500b-5p | 0.09818862 | -6.03E-01 | Down |
| hsa-miR-876-3p | 0.099061 | -4.21E-01 | Down |
| hsa-mir-510 | 0.09911618 | -3.57E-01 | Down |
| hsa-mir-93 | 0.0995991 | -5.15E-01 | Down |
| hsa-miR-485-3p | 0.1000491 | -6.95E-01 | Down |
| hsa-miR-490-5p | 0.10008167 | -5.82E-01 | Down |
| hsa-miR-4782-3p | 0.10013916 | -5.23E-01 | Down |
| hsa-miR-5581-3p | 0.1003864 | -3.85E-01 | Down |
| hsa-miR-4672 | 0.10045478 | -7.11E-01 | Down |
| hsa-mir-6738 | 0.10062774 | -4.70E-01 | Down |
| hsa-miR-6856-5p | 0.1006449 | -3.01E-01 | Down |
| hsa-mir-6827 | 0.10070528 | -3.98E-01 | Down |
| hsa-miR-6762-5p | 0.10089078 | -7.09E-01 | Down |
| hsa-miR-6500-3p | 0.1012661 | -4.85E-01 | Down |
| hsa-miR-7851-3p | 0.10159271 | -3.66E-01 | Down |
| hsa-miR-483-3p | 0.10195669 | -1.06 | Down |
| hsa-miR-186-5p | 0.10202484 | -9.30E-01 | Down |
| hsa-miR-6833-5p | 0.10221493 | -4.07E-01 | Down |
| hsa-miR-5680 | 0.10252525 | -5.46E-01 | Down |
| hsa-miR-3939 | 0.10252981 | -6.65E-01 | Down |
| hsa-miR-2116-5p | 0.1025502 | -6.67E-01 | Down |
| hsa-miR-4314 | 0.10269157 | -8.60E-01 | Down |
| hsa-miR-4650-5p | 0.10299164 | -4.07E-01 | Down |
| hsa-mir-3938 | 0.10574768 | -4.21E-01 | Down |
| hsa-mir-5699 | 0.10671554 | -3.71E-01 | Down |
| hsa-miR-542-5p | 0.1067299 | -5.26E-01 | Down |
| hsa-mir-6847 | 0.10734815 | -6.36E-01 | Down |
| hsa-mir-6856 | 0.10736875 | -4.96E-01 | Down |
| hsa-mir-4729 | 0.10766065 | -3.60E-01 | Down |
| hsa-let-7f-2 | 0.10817245 | -3.34E-01 | Down |
| hsa-miR-4419b | 0.10966813 | -4.01E-01 | Down |
| hsa-miR-371b-3p | 0.10971409 | -3.90E-01 | Down |
| hsa-miR-3682-3p | 0.11022755 | -5.58E-01 | Down |
| hsa-mir-4735 | 0.11026849 | -4.13E-01 | Down |
| hsa-mir-626 | 0.11116996 | -4.06E-01 | Down |
| hsa-miR-483-5p | 0.11304591 | -3.22E-01 | Down |
| hsa-mir-30c-2 | 0.11327188 | -4.19E-01 | Down |
| hsa-mir-129-1 | 0.11367789 | -3.58E-01 | Down |
| hsa-miR-204-3p | 0.11480039 | -3.94E-01 | Down |
| hsa-mir-5047 | 0.11495972 | -3.19E-01 | Down |
| hsa-miR-4537 | 0.11588513 | -4.85E-01 | Down |
| hsa-mir-6133 | 0.11645874 | -3.12E-01 | Down |
| hsa-miR-4755-5p | 0.11650336 | -6.75E-01 | Down |
| hsa-mir-3686 | 0.11676617 | -6.56E-01 | Down |
| hsa-mir-5700 | 0.11780553 | -3.39E-01 | Down |
| hsa-miR-6857-5p | 0.11876511 | -6.54E-01 | Down |
| hsa-miR-548at-5p | 0.11904367 | -3.84E-01 | Down |
| hsa-mir-377 | 0.11938282 | -8.16E-01 | Down |
| hsa-mir-181a-1 | 0.12107111 | -7.10E-01 | Down |
| hsa-miR-3942-3p | 0.12118565 | -3.44E-01 | Down |
| hsa-miR-7152-3p | 0.12129602 | -3.07E-01 | Down |
| hsa-miR-4775 | 0.12142095 | -3.09E-01 | Down |
| hsa-mir-4703 | 0.12162996 | -5.21E-01 | Down |
| hsa-mir-6807 | 0.12272536 | -3.80E-01 | Down |
| hsa-miR-218-5p | 0.12282324 | -3.86E-01 | Down |
| hsa-miR-6767-3p | 0.12323624 | -4.45E-01 | Down |
| hsa-mir-7153 | 0.12329802 | -5.10E-01 | Down |
| hsa-mir-5680 | 0.12456764 | -3.29E-01 | Down |
| hsa-mir-519e | 0.12470355 | -6.03E-01 | Down |
| hsa-let-7b | 0.12473531 | -3.28E-01 | Down |
| hsa-mir-302e | 0.12578584 | -4.32E-01 | Down |
| hsa-mir-4783 | 0.12625375 | -4.65E-01 | Down |
| hsa-mir-3913-1 | 0.12647546 | -3.09E-01 | Down |
| hsa-mir-3913-2 | 0.12647546 | -3.09E-01 | Down |
| hsa-miR-7160-3p | 0.12795841 | -3.44E-01 | Down |
| hsa-mir-4690 | 0.12901834 | -5.16E-01 | Down |
| hsa-miR-4735-5p | 0.12906521 | -5.17E-01 | Down |
| hsa-miR-503-5p | 0.12955764 | -2.63E-01 | Down |
| hsa-miR-571 | 0.13008882 | -4.84E-01 | Down |
| hsa-miR-125a-3p | 0.13025967 | -5.56E-01 | Down |
| hsa-mir-4257 | 0.13027672 | -4.08E-01 | Down |
| hsa-miR-892c-5p | 0.13054125 | -4.25E-01 | Down |
| hsa-mir-4669 | 0.13057818 | -5.43E-01 | Down |
| hsa-miR-5007-3p | 0.13077803 | -4.31E-01 | Down |
| hsa-miR-4646-5p | 0.13123394 | -5.32E-01 | Down |
| hsa-miR-3653 | 0.13144389 | -4.41E-01 | Down |
| hsa-mir-106b | 0.13152903 | -4.04E-01 | Down |
| hsa-miR-3202 | 0.1316932 | -5.07E-01 | Down |
| hsa-miR-6728-5p | 0.13280163 | -4.15E-01 | Down |
| hsa-miR-6745 | 0.13327323 | -4.67E-01 | Down |
| hsa-mir-3148 | 0.13354557 | -5.92E-01 | Down |
| hsa-mir-4440 | 0.13412846 | -5.66E-01 | Down |
| hsa-mir-6890 | 0.13472618 | -3.44E-01 | Down |
| hsa-mir-548s | 0.13518129 | -3.67E-01 | Down |
| hsa-mir-1976 | 0.1352831 | -2.85E-01 | Down |
| hsa-mir-6772 | 0.13539629 | -4.29E-01 | Down |
| hsa-miR-4468 | 0.13574718 | -4.11E-01 | Down |
| hsa-miR-548d-3p | 0.13621892 | -3.09E-01 | Down |
| hsa-mir-4797 | 0.13693768 | -4.55E-01 | Down |
| hsa-mir-517b | 0.13727004 | -4.11E-01 | Down |
| hsa-mir-6766 | 0.13731015 | -3.05E-01 | Down |
| hsa-miR-5691 | 0.13756271 | -3.09E-01 | Down |
| hsa-miR-487b-5p | 0.13903841 | -4.13E-01 | Down |
| hsa-mir-3935 | 0.13973049 | -2.79E-01 | Down |
| hsa-mir-208b | 0.14026291 | -3.33E-01 | Down |
| hsa-mir-3622b | 0.14202356 | -3.97E-01 | Down |
| hsa-mir-27b | 0.14232144 | -4.90E-01 | Down |
| hsa-miR-3977 | 0.14253653 | -6.09E-01 | Down |
| hsa-miR-1910-5p | 0.14332891 | -3.64E-01 | Down |
| hsa-miR-4327 | 0.14343673 | -4.07E-01 | Down |
| hsa-miR-424-3p | 0.14379592 | -1.08 | Down |
| hsa-mir-133a-2 | 0.14388315 | -6.54E-01 | Down |
| hsa-miR-200c-5p | 0.14390719 | -6.08E-01 | Down |
| hsa-miR-8076 | 0.14482873 | -3.14E-01 | Down |
| hsa-mir-3928 | 0.14510269 | -2.81E-01 | Down |
| hsa-miR-509-3-5p | 0.14563986 | -6.46E-01 | Down |
| hsa-miR-372-3p | 0.14667176 | -1.15 | Down |
| hsa-mir-4455 | 0.14728547 | -4.06E-01 | Down |
| hsa-miR-6833-3p | 0.14740573 | -5.33E-01 | Down |
| hsa-mir-2117 | 0.14777701 | -3.13E-01 | Down |
| hsa-mir-3651 | 0.14844382 | -5.49E-01 | Down |
| hsa-miR-2054 | 0.14890387 | -3.69E-01 | Down |
| hsa-miR-4671-5p | 0.14954717 | -4.01E-01 | Down |
| hsa-miR-1247-5p | 0.14981273 | -5.64E-01 | Down |
| hsa-mir-4475 | 0.14983805 | -2.92E-01 | Down |
| hsa-miR-6507-5p | 0.14985923 | -3.69E-01 | Down |
| hsa-mir-3927 | 0.15004151 | -3.44E-01 | Down |
| hsa-miR-4280 | 0.15191625 | -3.56E-01 | Down |
| hsa-mir-3160-2 | 0.15225684 | -4.73E-01 | Down |
| hsa-mir-34c | 0.15239059 | -2.53E-01 | Down |
| hsa-miR-181b-5p | 0.15275061 | -5.83E-01 | Down |
| hsa-miR-1244 | 0.15335635 | -1.35 | Down |
| hsa-mir-320b-2 | 0.15359253 | -2.89E-01 | Down |
| hsa-miR-548a-5p | 0.15364045 | -6.94E-01 | Down |
| hsa-mir-4311 | 0.15384426 | -3.22E-01 | Down |
| hsa-mir-6500 | 0.15391603 | -4.09E-01 | Down |
| hsa-miR-3922-3p | 0.15396203 | -4.34E-01 | Down |
| hsa-mir-650 | 0.15407415 | -5.58E-01 | Down |

**Supplementary Table 3 The differential expression results of mRNAs.**

| Gene.symbol | Gene.title | adj.P.Val | logFC | Regulation |
| --- | --- | --- | --- | --- |
| CTAG2 | cancer/testis antigen 2 | 2.09E-39 | 3.54003392 | Up |
| IL13RA2 | interleukin 13 receptor subunit alpha 2 | 2.59E-40 | 3.35343559 | Up |
| TPM2 | tropomyosin 2 (beta) | 7.56E-39 | 3.18284645 | Up |
| IFI27 | interferon alpha inducible protein 27 | 1.18E-36 | 2.96286668 | Up |
| RGS5 | regulator of G-protein signaling 5 | 7.04E-37 | 2.88351844 | Up |
| RPL14 | ribosomal protein L14 | 2.61E-35 | 2.80135986 | Up |
| CCNA1 | cyclin A1 | 9.06E-35 | 2.7409234 | Up |
| FBN2 | fibrillin 2 | 2.17E-35 | 2.70570584 | Up |
| TPM2 | tropomyosin 2 (beta) | 2.24E-34 | 2.62468641 | Up |
| NSG1 | neuron specific gene family member 1 | 1.04E-33 | 2.5718809 | Up |
| HEY2 | hes related family bHLH transcription factor with YRPW motif 2 | 5.17E-33 | 2.45955156 | Up |
| RGS5 | regulator of G-protein signaling 5 | 5.14E-32 | 2.39732488 | Up |
| CHST1 | carbohydrate sulfotransferase 1 | 3.54E-32 | 2.39085736 | Up |
| SNHG8 | small nucleolar RNA host gene 8 | 1.38E-31 | 2.33357296 | Up |
| SPOCK1 | sparc/osteonectin, cwcv and kazal-like domains proteoglycan (testican) 1 | 5.76E-31 | 2.255388 | Up |
| BST2 | bone marrow stromal cell antigen 2 | 5.31E-30 | 2.24349667 | Up |
| NUDT11 | nudix hydrolase 11 | 1.66E-29 | 2.12043081 | Up |
| RNASE1 | ribonuclease A family member 1, pancreatic | 8.12E-29 | 2.0910738 | Up |
| QPCT | glutaminyl-peptide cyclotransferase | 3.59E-29 | 2.0844128 | Up |
| SLITRK4 | SLIT and NTRK like family member 4 | 1.87E-28 | 2.06859831 | Up |
| MPZL2 | myelin protein zero like 2 | 5.87E-29 | 2.06165628 | Up |
| TNFSF4 | tumor necrosis factor superfamily member 4 | 2.89E-28 | 2.04102158 | Up |
| ANTXR1 | anthrax toxin receptor 1 | 8.81E-28 | 2.03269031 | Up |
| TNFSF18 | tumor necrosis factor superfamily member 18 | 8.94E-29 | -2.06064245 | Down |
| NDN | necdin, MAGE family member | 1.55E-26 | -2.07624103 | Down |
| NR5A2 | nuclear receptor subfamily 5 group A member 2 | 5.87E-29 | -2.07963868 | Down |
| CDH11 | cadherin 11 | 2.94E-29 | -2.11450902 | Down |
| TACSTD2 | tumor-associated calcium signal transducer 2 | 7.68E-30 | -2.14744357 | Down |
| SMOC2 | SPARC related modular calcium binding 2 | 5.54E-30 | -2.1688643 | Down |
| ALDH1A2 | aldehyde dehydrogenase 1 family member A2 | 3.59E-30 | -2.1751183 | Down |
| UCHL1 | ubiquitin C-terminal hydrolase L1 | 1.87E-30 | -2.21673124 | Down |
| LYVE1 | lymphatic vessel endothelial hyaluronan receptor 1 | 4.57E-30 | -2.22016315 | Down |
| ANGPT2 | angiopoietin 2 | 6.68E-31 | -2.26113546 | Down |
| KBTBD11 | kelch repeat and BTB domain containing 11 | 9.88E-32 | -2.33674026 | Down |
| ANGPT2 | angiopoietin 2 | 1.57E-31 | -2.3591826 | Down |
| ADGRF5 | adhesion G protein-coupled receptor F5 | 2.46E-32 | -2.40139225 | Down |
| TRIML2 | tripartite motif family like 2 | 8.01E-34 | -2.53975696 | Down |
| HLA-DPA1 | major histocompatibility complex, class II, DP alpha 1 | 3.46E-35 | -2.81644426 | Down |
| HSD17B2 | hydroxysteroid 17-beta dehydrogenase 2 | 2.50E-37 | -2.95718817 | Down |
| HOXB8 | homeobox B8 | 7.56E-39 | -3.1253214 | Down |
| LYVE1 | lymphatic vessel endothelial hyaluronan receptor 1 | 8.77E-44 | -3.79419562 | Down |
| PDPN | podoplanin | 8.87E-46 | -4.15220429 | Down |
| GYPC | glycophorin C (Gerbich blood group) | 1.03E-46 | -4.26724388 | Down |
| GYPC | glycophorin C (Gerbich blood group) | 1.17E-48 | -4.59265196 | Down |
| FABP4 | fatty acid binding protein 4 | 2.57E-49 | -4.91021708 | Down |
| MMP1 | matrix metallopeptidase 1 | 7.64E-50 | -5.13628211 | Down |
| TFF3 | trefoil factor 3 | 7.74E-52 | -5.27070567 | Down |
| CLDN11 | claudin 11 | 3.74E-52 | -5.44107182 | Down |
